# Supplementary material for: Correlation between Key Steps and Hydricity in CO2 Hydrogenation Catalysed by Non-Noble Metal PNP-Pincer Complexes
Source: MDPI journal article supplement (doi:10.3390/catal13030592), 2023-03-15
Supplement: s1 [file s1]

## Role of Solvent (THF) in H<sub>2</sub>-Splitting Barrier

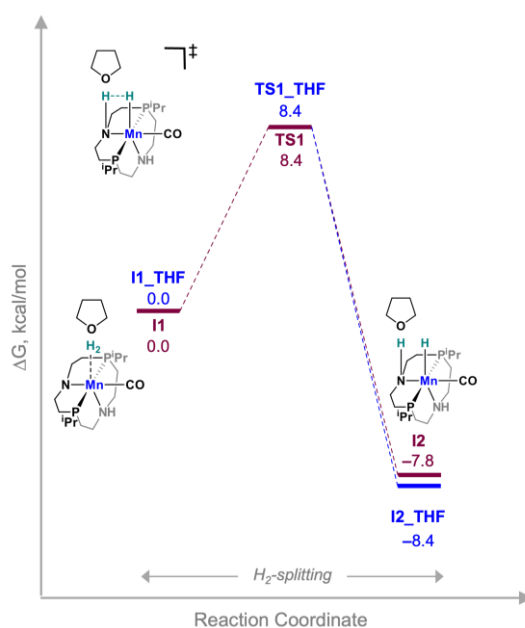

Figure S1. Role of explicit solvent (THF) on the H<sub>2</sub>-splitting barrier of 2<sub>Mn</sub>.

## Conformational Analysis of 2<sub>Mn</sub> and 3<sub>Fe</sub>

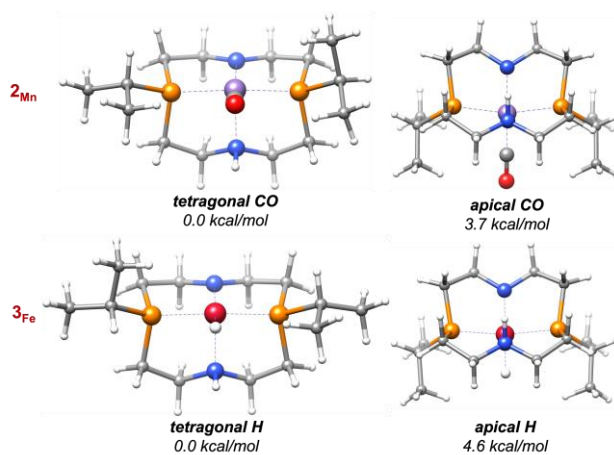

Figure S2. Different conformers of 2<sub>Mn</sub> and 3<sub>Fe</sub> along with their relative energies computed at the DFT- $\omega$ B97xD level of theory.

### Calculation of Hydricity ( $\Delta G^\circ_{\text{H}^-}$ )

For the calculation of thermodynamic hydricities of the metal–hydride intermediate (**I2**), we used a solvent–dependent protocol developed by Muckerman et. al. [44] Hydricity ( $\Delta G^\circ_{\text{H}^-}$ ) of a metal–hydride intermediate (MH) can be defined as the standard free energy change of the reaction,

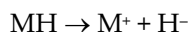

Therefore, mathematically, the hydricity of the metal–hydride intermediates ( $\Delta G^\circ_{\text{H}^-}$ ) can be expressed as:

$$\Delta G^\circ_{\text{H}^-} = G^\circ(\text{M}^+) + G^\circ(\text{H}^-) - G^\circ(\text{MH}) \dots\dots\dots (1)$$

To overcome the challenge of calculating the absolute free energy of a solvated hydride,  $G^\circ(\text{H}^-)$ , Muckerman et. al. proposed a protocol based on hydricity–half–reaction (HHR) as follows,

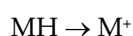

and by calculating its corresponding standard free energy change  $\Delta G^\circ_{\text{HHR}}(\text{MH})$ .

$$\Delta G^\circ_{\text{HHR}}(\text{MH}) = G^\circ(\text{M}^+) - G^\circ(\text{MH}) = \Delta G^\circ_{\text{H}^-} - G^\circ(\text{H}^-) \dots\dots\dots (2)$$

Thus, the experimentally determined hydricity  $\Delta G^\circ_{\text{H}^-}(\text{expt.})$  changes linearly with the hydricity–half–reaction  $\Delta G^\circ_{\text{HHR}}(\text{expt.})$  giving a unit slope and an intercept which is basically the absolute free energy of a solvated hydride( $G^\circ(\text{H}^-)$ ). By using this protocol, it is, therefore, possible to calculate the HHR free energy change  $\Delta G^\circ_{\text{HHR}}(\text{calc.})$  of a series of species whose hydricities are known experimentally.

In this work, to set up our linear fit equation, we choose already existing six different metal–hydride donor species whose hydricities were determined experimentally. Along with these six species, we have considered formate ( $\text{HCOO}^-$ ) to match our theoretical  $\Delta G^\circ_{\text{H}^-}(\text{CO}_2)$  value with its experimentally reported value.

**Table S1.** Experimental hydricities for the training set.

| Species                                                      | $\Delta G^\circ_{\text{H}^-}(\text{expt.})$ (kcal/mol) | References |
|--------------------------------------------------------------|--------------------------------------------------------|------------|
| $\text{HCOO}^-$                                              | 43                                                     | 44         |
| $\text{Ph}_3\text{CH}$                                       | 99                                                     | 45         |
| $\text{BNAH}^a$                                              | 59                                                     | 46         |
| $[\text{Pt}(\text{dmpp})\text{H}]^+$                         | 50.7                                                   | 47         |
| $[\text{Ni}(\text{dmpp})\text{H}]^+$                         | 62.1                                                   | 47         |
| $p\text{-(Me}_2\text{NC}_6\text{H}_4)_3\text{CH}$            | 74                                                     | 45         |
| $(\text{SiP}^{\text{iPr}}_3)\text{Fe}(\text{H}_2)(\text{H})$ | 54.3                                                   | 48         |

<sup>a</sup>BNAH: 1–benzyl–1,4–dihydronicotinamide; <sup>b</sup>dmpp: bis(dimethylphosphino)propane

Now, the DFT– $\omega$ B97XD calculated values of  $\Delta G^\circ_{\text{HHR}}$  in acetonitrile solvent are plotted against the experimental hydricities  $\Delta G^\circ_{\text{H}^-}$  in Figure S3.

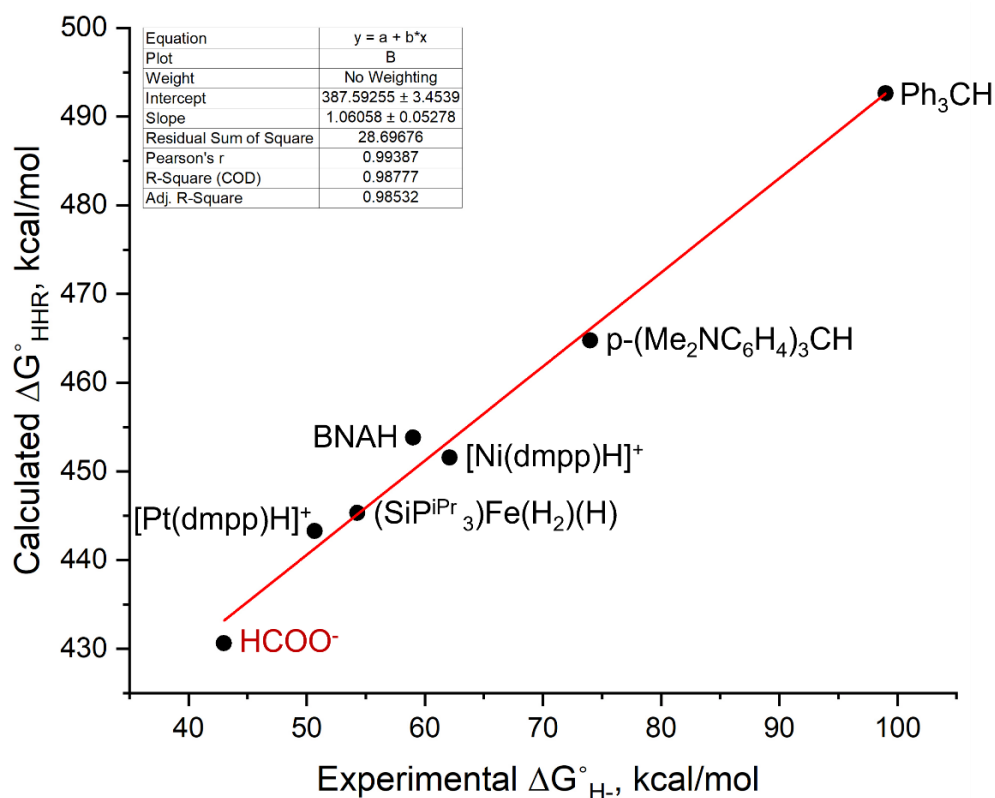

**Figure S3.** Correlation plot between calculated  $\Delta G^\circ_{\text{HHR}}$  and experimental  $\Delta G^\circ_{\text{H-}}$  of seven different species.

Figure S3 gives rise to the linear-fit equation,  $\Delta G^\circ_{\text{HHR}} = 387.6 + 1.06 \cdot \Delta G^\circ_{\text{H-}}$  following which the hydricities of the species of our interest have been calculated, which are tabulated in Table S2.

**Table S2.** Calculated hydricities ( $\Delta G^\circ_{\text{H-}}$  in kcal/mol) for all the species involved

| Species               | Hydricity |
|-----------------------|-----------|
| <b>1<sub>Mn</sub></b> | 55.2      |
| <b>2<sub>Mn</sub></b> | 47.1      |
| <b>3<sub>Fe</sub></b> | 48.7      |

Our calculation shows an uncertainty of about  $\pm 3.5$  kcal/mol in  $\Delta G^\circ_{\text{HHR}}$  in calculating absolute hydricity values which are clearly seen in Figure S3. This indicates that the level of theory and the solvation model plays a crucial role in the calculation of  $\Delta G^\circ_{\text{HHR}}$  values significantly which was predicted earlier by Muckerman et.al. But, this absolute error in the calculated hydricity can be neglected as we are mainly focusing on the relative hydricity of the reported species as we are concerned about the reactivity of that complexes towards the CO<sub>2</sub> hydrogenation reaction.

**Table S3.** Calculated hydricity and overall barriers for H<sub>2</sub> splitting and hydride transfer step.

| Species               | Calculated Hydricity<br>( $\Delta G_{H^-}^\circ$ , kcal/mol) | Overall H <sub>2</sub> -Splitting Barrier<br>( $\Delta G^\ddagger$ , kcal/mol) | Overall Hydride Transfer<br>Barrier ( $\Delta G^\ddagger$ , kcal/mol) |
|-----------------------|--------------------------------------------------------------|--------------------------------------------------------------------------------|-----------------------------------------------------------------------|
| <b>1<sub>Mn</sub></b> | 55.2                                                         | 14.6                                                                           | 11.5                                                                  |
| <b>2<sub>Mn</sub></b> | 47.1                                                         | 10.0                                                                           | 7.4                                                                   |
| <b>3<sub>Fe</sub></b> | 48.7                                                         | 9.9                                                                            | 8.1                                                                   |

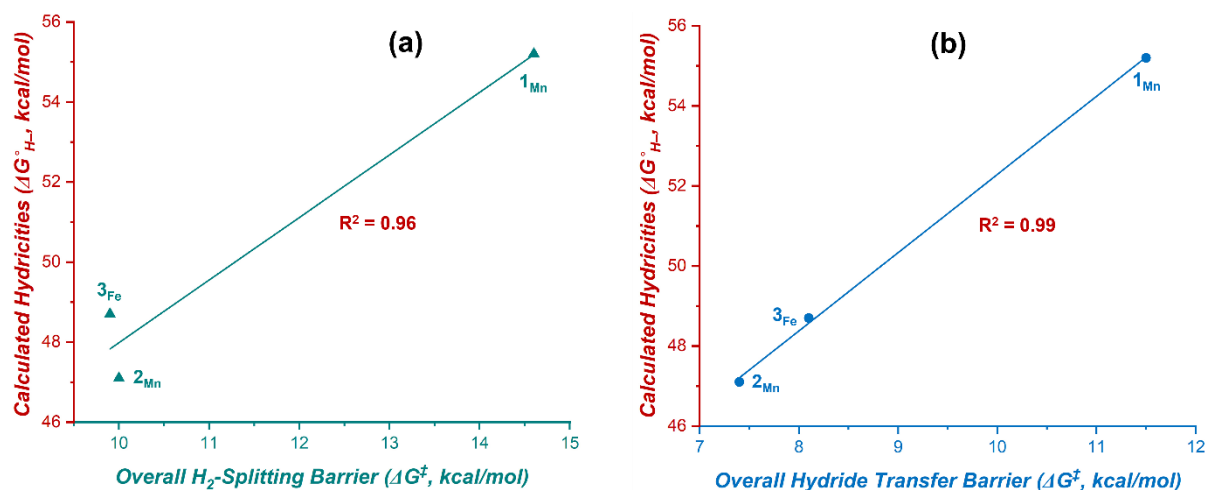**Figure S4.** Correlation plot between the “overall” free energy barrier of the key steps of CO<sub>2</sub> hydrogenation and calculated hydricities of the metal–hydride intermediates obtained at the DFT– $\omega$ B97xD level. (a) H<sub>2</sub> splitting (b) hydride transfer.

Table S3 collects the free energy barriers for the two key steps of CO<sub>2</sub> hydrogenation, that is, H<sub>2</sub> splitting and hydride transfer calculated relative to the separated reactants for the three complexes **1<sub>Mn</sub>**, **2<sub>Mn</sub>**, and **3<sub>Fe</sub>**. These “overall” free energy barriers are marked in the reaction free energy profiles presented in Figures 1, 2, and 3 in the main text. Although very good correlations,  $R^2 = 0.96$  for H<sub>2</sub>-splitting (Figure S4a) and  $R^2 = 0.99$  for hydride transfer (Figure S4b), were observed between the calculated hydricity and overall free energy barriers, the correlation for the H<sub>2</sub> splitting step yields a positive slope. This implies that the metal–hydride intermediate possessing a lower hydricity exhibits a lower H<sub>2</sub> splitting barrier and vice versa. At the same time, the hydride transfer step also shows a positive correlation (Figure S4b), suggesting a similar electronic requirement for both steps. This doesn’t corroborate the established opposite electronic structure requirement of the two key steps of CO<sub>2</sub> hydrogenation. [30,36,37] Therefore, we considered the “intrinsic” free energy barriers, the barriers computed using the H<sub>2</sub> and CO<sub>2</sub> bound species, **I1** and **I3** as the reference to generate the correlation plots. This gives thermodynamic correlations that appropriately reflect the opposite electronic requirements of the key reaction steps: negative correlation for the H<sub>2</sub> splitting step (Figure S5a) and positive correlation for the

hydride transfer step (Figure S5b). The unexpected correlation observed with the “overall” barrier might be due to the uncertainties (e.g., different spin states of the free catalyst, error in entropy contribution) associated with the barriers calculated from separated reactants.

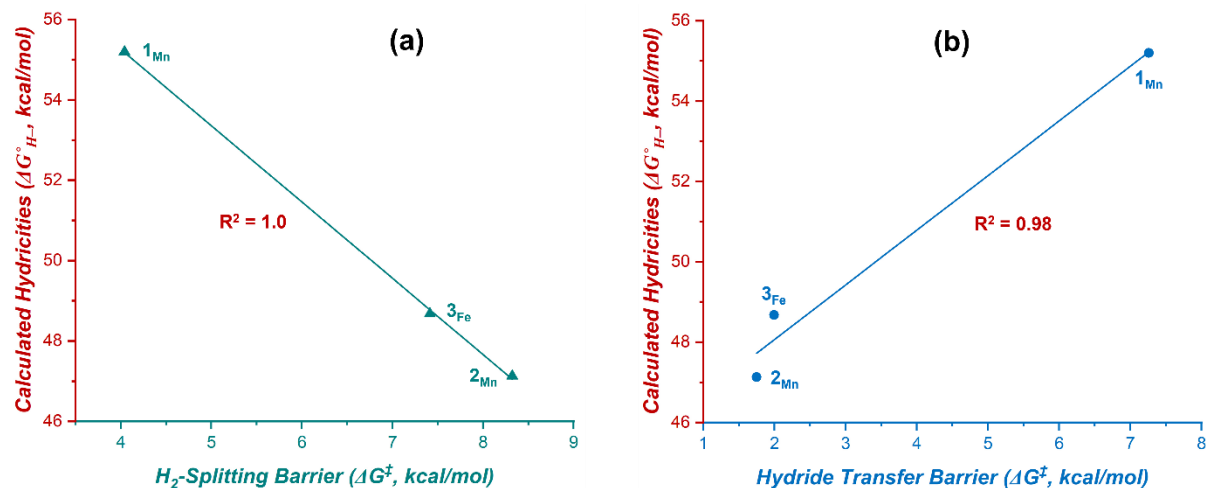

**Figure S5.** Correlation plot between the “intrinsic” free energy barrier of the key steps of CO<sub>2</sub> hydrogenation and calculated hydricities of the metal–hydride intermediates obtained at the DFT– $\omega$ B97xD level. (a) H<sub>2</sub> splitting (b) hydride transfer.

**Table S4. Optimized Cartesian Coordinates for the Species Involved.**

|                       |              |              |              |
|-----------------------|--------------|--------------|--------------|
| <b>1<sub>Mn</sub></b> |              |              |              |
| 25                    | 0.109297000  | 0.462231000  | −0.483405000 |
| 7                     | 0.082954000  | −1.302687000 | −1.437311000 |
| 6                     | 0.118755000  | 1.675592000  | 0.822880000  |
| 8                     | 0.116747000  | 2.455561000  | 1.681043000  |
| 6                     | 3.009227000  | −1.131960000 | −1.333346000 |
| 1                     | 3.625447000  | −0.569127000 | −2.042013000 |
| 1                     | 3.645188000  | −1.875121000 | −0.842946000 |
| 6                     | −2.779769000 | −0.810813000 | −1.550247000 |
| 6                     | 0.127851000  | 1.709443000  | −1.723692000 |
| 8                     | 0.137782000  | 2.462496000  | −2.605747000 |
| 15                    | −2.150960000 | 0.307289000  | −0.260521000 |
| 15                    | 2.310680000  | 0.061861000  | −0.142910000 |
| 6                     | 2.220587000  | −0.838198000 | 1.456385000  |
| 6                     | 2.480608000  | −0.180624000 | 2.663822000  |
| 6                     | 1.714368000  | −2.143054000 | 1.492649000  |
| 6                     | 2.256209000  | −0.821571000 | 3.878643000  |
| 1                     | 2.853700000  | 0.838810000  | 2.657258000  |
| 6                     | 1.497673000  | −2.784288000 | 2.707781000  |
| 1                     | 1.446225000  | −2.647156000 | 0.570796000  |
| 6                     | 1.769229000  | −2.125869000 | 3.904463000  |
| 1                     | 2.462363000  | −0.298070000 | 4.806894000  |
| 1                     | 1.101201000  | −3.794699000 | 2.716767000  |
| 1                     | 1.596986000  | −2.624890000 | 4.853282000  |

|    |              |              |              |
|----|--------------|--------------|--------------|
| 6  | 3.591331000  | 1.331907000  | 0.132722000  |
| 6  | 4.884645000  | 0.975441000  | 0.534806000  |
| 6  | 3.288884000  | 2.676879000  | -0.084898000 |
| 6  | 5.855974000  | 1.951086000  | 0.718893000  |
| 1  | 5.125997000  | -0.069230000 | 0.711590000  |
| 6  | 4.264514000  | 3.654870000  | 0.098176000  |
| 1  | 2.289149000  | 2.958913000  | -0.398571000 |
| 6  | 5.545483000  | 3.293212000  | 0.500153000  |
| 1  | 6.855591000  | 1.667653000  | 1.033061000  |
| 1  | 4.019768000  | 4.698121000  | -0.073257000 |
| 1  | 6.305114000  | 4.055254000  | 0.644114000  |
| 6  | -2.635065000 | -0.540640000 | 1.291367000  |
| 6  | -1.660449000 | -0.877626000 | 2.233889000  |
| 6  | -3.962491000 | -0.921200000 | 1.523667000  |
| 6  | -2.001648000 | -1.592310000 | 3.379897000  |
| 1  | -0.623120000 | -0.598856000 | 2.074666000  |
| 6  | -4.304697000 | -1.629084000 | 2.669244000  |
| 1  | -4.734243000 | -0.654337000 | 0.806614000  |
| 6  | -3.321964000 | -1.969634000 | 3.597781000  |
| 1  | -1.226527000 | -1.852902000 | 4.093237000  |
| 1  | -5.337205000 | -1.918687000 | 2.837716000  |
| 1  | -3.588940000 | -2.527794000 | 4.489854000  |
| 6  | -3.169862000 | 1.827140000  | -0.289714000 |
| 6  | -3.313671000 | 2.509919000  | -1.502816000 |
| 6  | -3.722668000 | 2.378109000  | 0.868842000  |
| 6  | -4.016929000 | 3.707286000  | -1.559755000 |
| 1  | -2.863211000 | 2.114273000  | -2.408811000 |
| 6  | -4.423104000 | 3.580314000  | 0.810467000  |
| 1  | -3.608086000 | 1.869834000  | 1.820879000  |
| 6  | -4.575699000 | 4.244343000  | -0.402177000 |
| 1  | -4.122614000 | 4.224768000  | -2.507966000 |
| 1  | -4.848667000 | 3.997612000  | 1.717730000  |
| 1  | -5.122852000 | 5.180818000  | -0.445757000 |
| 14 | -1.413878000 | -2.123537000 | -1.732748000 |
| 14 | 1.505227000  | -1.879659000 | -2.238585000 |
| 6  | -1.696953000 | -3.523346000 | -0.501843000 |
| 1  | -2.688463000 | -3.975255000 | -0.614598000 |
| 1  | -0.950306000 | -4.311348000 | -0.652871000 |
| 1  | -1.601355000 | -3.164213000 | 0.527690000  |
| 6  | -1.641069000 | -2.818187000 | -3.477833000 |
| 1  | -0.916962000 | -3.595253000 | -3.739616000 |
| 1  | -2.640345000 | -3.259771000 | -3.566799000 |
| 1  | -1.561922000 | -2.021608000 | -4.225202000 |
| 6  | 1.721810000  | -3.759827000 | -2.177444000 |
| 1  | 1.775387000  | -4.125315000 | -1.146050000 |
| 1  | 0.908859000  | -4.297973000 | -2.673871000 |
| 1  | 2.655002000  | -4.044377000 | -2.676621000 |
| 6  | 1.615990000  | -1.316928000 | -4.033318000 |
| 1  | 2.577722000  | -1.591329000 | -4.481424000 |
| 1  | 0.823060000  | -1.759509000 | -4.643858000 |
| 1  | 1.510116000  | -0.228028000 | -4.089470000 |

|   |              |              |              |
|---|--------------|--------------|--------------|
| 1 | -3.778785000 | -1.203853000 | -1.341739000 |
| 1 | -2.809899000 | -0.253581000 | -2.493292000 |

## I1

|    |              |              |              |
|----|--------------|--------------|--------------|
| 25 | 0.009758000  | -0.154240000 | -0.091571000 |
| 7  | 0.044960000  | 1.953905000  | 0.293041000  |
| 6  | 0.034342000  | -1.909484000 | -0.375109000 |
| 8  | 0.067226000  | -3.049091000 | -0.593564000 |
| 6  | -2.542864000 | 1.413130000  | 1.367038000  |
| 1  | -3.596095000 | 1.662782000  | 1.519960000  |
| 1  | -2.076505000 | 1.284038000  | 2.351229000  |
| 6  | 2.715405000  | 1.709697000  | -0.778845000 |
| 6  | -0.248167000 | 0.284118000  | -1.804505000 |
| 8  | -0.390124000 | 0.649891000  | -2.890067000 |
| 15 | 2.292374000  | -0.000296000 | -0.323558000 |
| 15 | -2.244924000 | -0.132953000 | 0.460831000  |
| 6  | -2.884189000 | -1.489513000 | 1.529036000  |
| 6  | -2.866319000 | -2.803671000 | 1.046859000  |
| 6  | -3.371137000 | -1.253184000 | 2.816364000  |
| 6  | -3.320765000 | -3.854036000 | 1.835071000  |
| 1  | -2.497287000 | -3.013600000 | 0.048290000  |
| 6  | -3.822908000 | -2.306841000 | 3.608048000  |
| 1  | -3.409615000 | -0.243001000 | 3.209954000  |
| 6  | -3.797653000 | -3.608783000 | 3.120723000  |
| 1  | -3.299523000 | -4.866453000 | 1.444373000  |
| 1  | -4.198473000 | -2.105247000 | 4.606498000  |
| 1  | -4.149555000 | -4.429531000 | 3.737778000  |
| 6  | -3.440564000 | -0.169279000 | -0.928718000 |
| 6  | -4.621120000 | 0.578014000  | -0.930461000 |
| 6  | -3.173061000 | -1.007668000 | -2.015667000 |
| 6  | -5.507700000 | 0.497225000  | -1.999426000 |
| 1  | -4.853601000 | 1.238468000  | -0.102266000 |
| 6  | -4.065311000 | -1.099488000 | -3.078611000 |
| 1  | -2.255197000 | -1.587727000 | -2.036316000 |
| 6  | -5.233032000 | -0.342801000 | -3.074637000 |
| 1  | -6.415179000 | 1.092719000  | -1.991268000 |
| 1  | -3.840608000 | -1.753760000 | -3.914825000 |
| 1  | -5.925128000 | -0.404227000 | -3.908524000 |
| 6  | 3.195100000  | -0.369006000 | 1.228599000  |
| 6  | 2.975232000  | -1.618384000 | 1.823109000  |
| 6  | 4.079101000  | 0.521279000  | 1.839458000  |
| 6  | 3.624054000  | -1.966472000 | 3.000658000  |
| 1  | 2.292073000  | -2.323881000 | 1.357187000  |
| 6  | 4.723677000  | 0.175644000  | 3.026489000  |
| 1  | 4.264654000  | 1.495858000  | 1.401943000  |
| 6  | 4.498468000  | -1.066394000 | 3.608281000  |
| 1  | 3.444995000  | -2.939340000 | 3.447407000  |
| 1  | 5.402203000  | 0.882427000  | 3.493725000  |
| 1  | 5.001009000  | -1.334830000 | 4.532159000  |
| 6  | 3.194578000  | -1.050327000 | -1.530402000 |
| 6  | 2.518327000  | -1.617518000 | -2.612752000 |

|    |              |              |              |
|----|--------------|--------------|--------------|
| 6  | 4.575612000  | -1.247576000 | -1.415682000 |
| 6  | 3.207914000  | -2.363655000 | -3.565041000 |
| 1  | 1.447732000  | -1.482036000 | -2.716121000 |
| 6  | 5.263420000  | -1.994116000 | -2.364989000 |
| 1  | 5.114202000  | -0.821912000 | -0.573821000 |
| 6  | 4.580026000  | -2.553780000 | -3.442577000 |
| 1  | 2.668214000  | -2.800281000 | -4.399348000 |
| 1  | 6.333968000  | -2.142002000 | -2.262515000 |
| 1  | 5.116939000  | -3.139399000 | -4.182320000 |
| 14 | 1.480362000  | 2.864704000  | 0.104308000  |
| 14 | -1.463659000 | 2.729067000  | 0.511779000  |
| 6  | 2.215121000  | 3.457373000  | 1.741914000  |
| 1  | 3.208525000  | 3.903715000  | 1.613869000  |
| 1  | 1.565609000  | 4.220815000  | 2.184087000  |
| 1  | 2.297171000  | 2.637281000  | 2.462138000  |
| 6  | 1.311648000  | 4.382135000  | -1.012512000 |
| 1  | 0.628621000  | 5.128580000  | -0.592906000 |
| 1  | 2.280274000  | 4.872605000  | -1.161978000 |
| 1  | 0.922738000  | 4.091815000  | -1.994503000 |
| 6  | -1.421826000 | 4.216347000  | 1.679321000  |
| 1  | -1.003705000 | 3.938035000  | 2.652514000  |
| 1  | -0.814472000 | 5.035136000  | 1.279100000  |
| 1  | -2.431312000 | 4.609980000  | 1.843025000  |
| 6  | -2.310722000 | 3.279301000  | -1.081882000 |
| 1  | -3.330446000 | 3.637331000  | -0.898328000 |
| 1  | -1.745839000 | 4.097139000  | -1.542608000 |
| 1  | -2.366002000 | 2.465367000  | -1.810934000 |
| 1  | 3.777707000  | 1.943563000  | -0.660535000 |
| 1  | 2.485551000  | 1.778257000  | -1.849396000 |
| 1  | 0.202136000  | -0.639186000 | 1.639866000  |
| 1  | 0.324988000  | 0.134990000  | 1.641230000  |

# TS1

|    |              |              |              |
|----|--------------|--------------|--------------|
| 25 | 0.016360000  | -0.145274000 | 0.135584000  |
| 7  | -0.080846000 | 1.975706000  | -0.435581000 |
| 6  | 0.026364000  | -1.916877000 | 0.236600000  |
| 8  | 0.033529000  | -3.075591000 | 0.287373000  |
| 6  | 2.571031000  | 1.429890000  | -1.346699000 |
| 1  | 3.633621000  | 1.675938000  | -1.425903000 |
| 1  | 2.205314000  | 1.238116000  | -2.362973000 |
| 6  | -2.682561000 | 1.679528000  | 0.820502000  |
| 6  | 0.328675000  | 0.148204000  | 1.874526000  |
| 8  | 0.527620000  | 0.413331000  | 2.982504000  |
| 15 | -2.252678000 | -0.039338000 | 0.381811000  |
| 15 | 2.240188000  | -0.118061000 | -0.429887000 |
| 6  | 2.872225000  | -1.436951000 | -1.542548000 |
| 6  | 4.213266000  | -1.833577000 | -1.531058000 |
| 6  | 1.999965000  | -2.019793000 | -2.466800000 |
| 6  | 4.671113000  | -2.793895000 | -2.427368000 |
| 1  | 4.902083000  | -1.396086000 | -0.814760000 |
| 6  | 2.460456000  | -2.976703000 | -3.366056000 |



|    |              |              |              |
|----|--------------|--------------|--------------|
| 1  | 0.955359000  | -1.724125000 | -2.477314000 |
| 6  | 3.796156000  | -3.366811000 | -3.346681000 |
| 1  | 5.713479000  | -3.096529000 | -2.405908000 |
| 1  | 1.771687000  | -3.423431000 | -4.076234000 |
| 1  | 4.154302000  | -4.118675000 | -4.043097000 |
| 6  | 3.433969000  | -0.178181000 | 0.956108000  |
| 6  | 4.432912000  | 0.773160000  | 1.166465000  |
| 6  | 3.321160000  | -1.249309000 | 1.851573000  |
| 6  | 5.299549000  | 0.660685000  | 2.251940000  |
| 1  | 4.538111000  | 1.616850000  | 0.493461000  |
| 6  | 4.191805000  | -1.367840000 | 2.926968000  |
| 1  | 2.543932000  | -1.994285000 | 1.703303000  |
| 6  | 5.182623000  | -0.409402000 | 3.131554000  |
| 1  | 6.066064000  | 1.413392000  | 2.407301000  |
| 1  | 4.091973000  | -2.204338000 | 3.611189000  |
| 1  | 5.858083000  | -0.496279000 | 3.976757000  |
| 6  | -3.195003000 | -0.416593000 | -1.147148000 |
| 6  | -2.886224000 | -1.603471000 | -1.823112000 |
| 6  | -4.202771000 | 0.403716000  | -1.657809000 |
| 6  | -3.571530000 | -1.960755000 | -2.977364000 |
| 1  | -2.101328000 | -2.250454000 | -1.443067000 |
| 6  | -4.882893000 | 0.051829000  | -2.822611000 |
| 1  | -4.459242000 | 1.332794000  | -1.160224000 |
| 6  | -4.570273000 | -1.130490000 | -3.483201000 |
| 1  | -3.321765000 | -2.885996000 | -3.487087000 |
| 1  | -5.656824000 | 0.706407000  | -3.211185000 |
| 1  | -5.100201000 | -1.405039000 | -4.389868000 |
| 6  | -3.134355000 | -1.069269000 | 1.619875000  |
| 6  | -2.421336000 | -1.764625000 | 2.597829000  |
| 6  | -4.532661000 | -1.137021000 | 1.621985000  |
| 6  | -3.092295000 | -2.509122000 | 3.565484000  |
| 1  | -1.337960000 | -1.730036000 | 2.605468000  |
| 6  | -5.201901000 | -1.879293000 | 2.586936000  |
| 1  | -5.100288000 | -0.615361000 | 0.856383000  |
| 6  | -4.481347000 | -2.566879000 | 3.562133000  |
| 1  | -2.524978000 | -3.046331000 | 4.318792000  |
| 1  | -6.286433000 | -1.925712000 | 2.576666000  |
| 1  | -5.004073000 | -3.149377000 | 4.314439000  |
| 14 | -1.551018000 | 2.846438000  | -0.166700000 |
| 14 | 1.446020000  | 2.767817000  | -0.609595000 |
| 6  | -2.367363000 | 3.353937000  | -1.786996000 |
| 1  | -3.351322000 | 3.810569000  | -1.630356000 |
| 1  | -1.738296000 | 4.086822000  | -2.304277000 |
| 1  | -2.492251000 | 2.494502000  | -2.452863000 |
| 6  | -1.328880000 | 4.390926000  | 0.893895000  |
| 1  | -0.680180000 | 5.134795000  | 0.420117000  |
| 1  | -2.298462000 | 4.868758000  | 1.073704000  |
| 1  | -0.894289000 | 4.135344000  | 1.865764000  |
| 6  | 1.396651000  | 4.213661000  | -1.821234000 |
| 1  | 1.018904000  | 3.888394000  | -2.796197000 |
| 1  | 0.748573000  | 5.022052000  | -1.466241000 |

|   |              |              |              |
|---|--------------|--------------|--------------|
| 1 | 2.396087000  | 4.637407000  | -1.968903000 |
| 6 | 2.155116000  | 3.376102000  | 1.025309000  |
| 1 | 3.178297000  | 3.750272000  | 0.905090000  |
| 1 | 1.549025000  | 4.195492000  | 1.424535000  |
| 1 | 2.172136000  | 2.578308000  | 1.773984000  |
| 1 | -3.753506000 | 1.898350000  | 0.768901000  |
| 1 | -2.382154000 | 1.778303000  | 1.871044000  |
| 1 | -0.230251000 | 0.807100000  | -1.276636000 |
| 1 | -0.268057000 | -0.115175000 | -1.542058000 |

## I2

|    |              |              |              |
|----|--------------|--------------|--------------|
| 25 | 0.018949000  | -0.166511000 | 0.294874000  |
| 7  | -0.166800000 | 1.910271000  | -0.721691000 |
| 6  | 0.028837000  | -1.853885000 | 0.816619000  |
| 8  | 0.024245000  | -2.973723000 | 1.122071000  |
| 6  | 2.371386000  | 1.035319000  | -1.686316000 |
| 1  | 3.413141000  | 1.206968000  | -1.970992000 |
| 1  | 1.845297000  | 0.675986000  | -2.578607000 |
| 6  | -2.658811000 | 1.706699000  | 0.834137000  |
| 6  | 0.304906000  | 0.519439000  | 1.913366000  |
| 8  | 0.494063000  | 0.975040000  | 2.969996000  |
| 15 | -2.230026000 | -0.023026000 | 0.374932000  |
| 15 | 2.136817000  | -0.290541000 | -0.428114000 |
| 6  | 2.716584000  | -1.806960000 | -1.305176000 |
| 6  | 4.072215000  | -2.149885000 | -1.360695000 |
| 6  | 1.790538000  | -2.617353000 | -1.968788000 |
| 6  | 4.490954000  | -3.271552000 | -2.069100000 |
| 1  | 4.808576000  | -1.545798000 | -0.840507000 |
| 6  | 2.210698000  | -3.738565000 | -2.678137000 |
| 1  | 0.738194000  | -2.359261000 | -1.921233000 |
| 6  | 3.561153000  | -4.068902000 | -2.730638000 |
| 1  | 5.546297000  | -3.524926000 | -2.099256000 |
| 1  | 1.477536000  | -4.359618000 | -3.183712000 |
| 1  | 3.888036000  | -4.947074000 | -3.279159000 |
| 6  | 3.502092000  | -0.031158000 | 0.780237000  |
| 6  | 4.647178000  | 0.732167000  | 0.535059000  |
| 6  | 3.373094000  | -0.659516000 | 2.023648000  |
| 6  | 5.631944000  | 0.874190000  | 1.509470000  |
| 1  | 4.783492000  | 1.226893000  | -0.421289000 |
| 6  | 4.359979000  | -0.529141000 | 2.994175000  |
| 1  | 2.486389000  | -1.250404000 | 2.232993000  |
| 6  | 5.490612000  | 0.243070000  | 2.741274000  |
| 1  | 6.510733000  | 1.477623000  | 1.303348000  |
| 1  | 4.239955000  | -1.023592000 | 3.952839000  |
| 1  | 6.257203000  | 0.354122000  | 3.501761000  |
| 6  | -3.144914000 | -0.317895000 | -1.193836000 |
| 6  | -2.805452000 | -1.457944000 | -1.932596000 |
| 6  | -4.168106000 | 0.506159000  | -1.669474000 |
| 6  | -3.473024000 | -1.765994000 | -3.111283000 |
| 1  | -2.000112000 | -2.094097000 | -1.579330000 |
| 6  | -4.825529000 | 0.209810000  | -2.863077000 |
| 1  | -4.465200000 | 1.390339000  | -1.115602000 |

|    |              |              |              |
|----|--------------|--------------|--------------|
| 6  | -4.481034000 | -0.927467000 | -3.584457000 |
| 1  | -3.199635000 | -2.656770000 | -3.668179000 |
| 1  | -5.610264000 | 0.868222000  | -3.222777000 |
| 1  | -4.994458000 | -1.160966000 | -4.512009000 |
| 6  | -3.197593000 | -1.020033000 | 1.578402000  |
| 6  | -2.618804000 | -1.295865000 | 2.821530000  |
| 6  | -4.492028000 | -1.478157000 | 1.316594000  |
| 6  | -3.324746000 | -2.005101000 | 3.787529000  |
| 1  | -1.609308000 | -0.957608000 | 3.031909000  |
| 6  | -5.194306000 | -2.194308000 | 2.281455000  |
| 1  | -4.953147000 | -1.282405000 | 0.353588000  |
| 6  | -4.613435000 | -2.457584000 | 3.518655000  |
| 1  | -2.861825000 | -2.212899000 | 4.747044000  |
| 1  | -6.196995000 | -2.549271000 | 2.063765000  |
| 1  | -5.161448000 | -3.018903000 | 4.269128000  |
| 14 | -1.521649000 | 2.886390000  | -0.103757000 |
| 14 | 1.461686000  | 2.551802000  | -1.043512000 |
| 6  | -2.412095000 | 3.675032000  | -1.558663000 |
| 1  | -3.294953000 | 4.232109000  | -1.226872000 |
| 1  | -1.754274000 | 4.372921000  | -2.087057000 |
| 1  | -2.745484000 | 2.917468000  | -2.275467000 |
| 6  | -0.904104000 | 4.195578000  | 1.084064000  |
| 1  | -0.310270000 | 4.970158000  | 0.589616000  |
| 1  | -1.766000000 | 4.686266000  | 1.549269000  |
| 1  | -0.303259000 | 3.749424000  | 1.882222000  |
| 6  | 1.386586000  | 3.896434000  | -2.357748000 |
| 1  | 0.891363000  | 3.540458000  | -3.267120000 |
| 1  | 0.833224000  | 4.769450000  | -1.993819000 |
| 1  | 2.390916000  | 4.235348000  | -2.633127000 |
| 6  | 2.263207000  | 3.228090000  | 0.507798000  |
| 1  | 3.343743000  | 3.305856000  | 0.348576000  |
| 1  | 1.892820000  | 4.225281000  | 0.757511000  |
| 1  | 2.108274000  | 2.574669000  | 1.370042000  |
| 1  | -3.723708000 | 1.945235000  | 0.752150000  |
| 1  | -2.394688000 | 1.774485000  | 1.896048000  |
| 1  | -0.475671000 | 1.417752000  | -1.561886000 |
| 1  | -0.177372000 | -0.672601000 | -1.204995000 |

### I3

|    |              |              |              |
|----|--------------|--------------|--------------|
| 25 | -0.063854000 | -0.292689000 | 0.425733000  |
| 7  | 0.115995000  | -0.835985000 | -1.808901000 |
| 6  | -0.076825000 | 0.367391000  | 2.062488000  |
| 8  | -0.071133000 | 0.837648000  | 3.124364000  |
| 6  | -2.419757000 | 0.467758000  | -1.776392000 |
| 1  | -3.463335000 | 0.573257000  | -2.085575000 |
| 1  | -1.898040000 | 1.380270000  | -2.086114000 |
| 6  | 2.602310000  | -1.937665000 | -0.682443000 |
| 6  | -0.399230000 | -1.973146000 | 0.913359000  |
| 8  | -0.620811000 | -3.072396000 | 1.230642000  |
| 15 | 2.179688000  | -0.515535000 | 0.404412000  |
| 15 | -2.179251000 | 0.365447000  | 0.046801000  |

|    |              |              |              |
|----|--------------|--------------|--------------|
| 6  | -2.754693000 | 2.016180000  | 0.630916000  |
| 6  | -4.118660000 | 2.317777000  | 0.722962000  |
| 6  | -1.822062000 | 3.009133000  | 0.940084000  |
| 6  | -4.538011000 | 3.586626000  | 1.106590000  |
| 1  | -4.859969000 | 1.555178000  | 0.504611000  |
| 6  | -2.243014000 | 4.280081000  | 1.322382000  |
| 1  | -0.764764000 | 2.780848000  | 0.872164000  |
| 6  | -3.600093000 | 4.572034000  | 1.406386000  |
| 1  | -5.599381000 | 3.804765000  | 1.175847000  |
| 1  | -1.504541000 | 5.039989000  | 1.557914000  |
| 1  | -3.928228000 | 5.561875000  | 1.708882000  |
| 6  | -3.546855000 | -0.716272000 | 0.637640000  |
| 6  | -4.676086000 | -1.054796000 | -0.112765000 |
| 6  | -3.434758000 | -1.219851000 | 1.938513000  |
| 6  | -5.663465000 | -1.881632000 | 0.417732000  |
| 1  | -4.797450000 | -0.679341000 | -1.123752000 |
| 6  | -4.424053000 | -2.035797000 | 2.474565000  |
| 1  | -2.559237000 | -0.974339000 | 2.532351000  |
| 6  | -5.540086000 | -2.373090000 | 1.713050000  |
| 1  | -6.529812000 | -2.139957000 | -0.183578000 |
| 1  | -4.317537000 | -2.416885000 | 3.485194000  |
| 1  | -6.308578000 | -3.018482000 | 2.126843000  |
| 6  | 3.146270000  | 0.891837000  | -0.275990000 |
| 6  | 2.918742000  | 2.153306000  | 0.288445000  |
| 6  | 4.085920000  | 0.777447000  | -1.302051000 |
| 6  | 3.614877000  | 3.268455000  | -0.160977000 |
| 1  | 2.173773000  | 2.258127000  | 1.071669000  |
| 6  | 4.769551000  | 1.899653000  | -1.769868000 |
| 1  | 4.293685000  | -0.186355000 | -1.753967000 |
| 6  | 4.537385000  | 3.145700000  | -1.199756000 |
| 1  | 3.423130000  | 4.238168000  | 0.286841000  |
| 1  | 5.486468000  | 1.793923000  | -2.578238000 |
| 1  | 5.071267000  | 4.019222000  | -1.560719000 |
| 6  | 3.111482000  | -0.894620000 | 1.943418000  |
| 6  | 2.465653000  | -1.607686000 | 2.957704000  |
| 6  | 4.453726000  | -0.539993000 | 2.112615000  |
| 6  | 3.149962000  | -1.965480000 | 4.115276000  |
| 1  | 1.422021000  | -1.880609000 | 2.842895000  |
| 6  | 5.135239000  | -0.893411000 | 3.272687000  |
| 1  | 4.968466000  | 0.021385000  | 1.338792000  |
| 6  | 4.485017000  | -1.607400000 | 4.275844000  |
| 1  | 2.634449000  | -2.516500000 | 4.895467000  |
| 1  | 6.175639000  | -0.607821000 | 3.394072000  |
| 1  | 5.016881000  | -1.879428000 | 5.182344000  |
| 14 | 1.467561000  | -1.928567000 | -2.191727000 |
| 14 | -1.503478000 | -0.993872000 | -2.528414000 |
| 6  | 2.349035000  | -1.269896000 | -3.714815000 |
| 1  | 3.270462000  | -1.826627000 | -3.916816000 |
| 1  | 1.707006000  | -1.351926000 | -4.597983000 |
| 1  | 2.610264000  | -0.214152000 | -3.590972000 |
| 6  | 0.859273000  | -3.676560000 | -2.480754000 |

|   |              |              |              |
|---|--------------|--------------|--------------|
| 1 | 0.264092000  | -3.771856000 | -3.393920000 |
| 1 | 1.724100000  | -4.341786000 | -2.579073000 |
| 1 | 0.261367000  | -4.029551000 | -1.635020000 |
| 6 | -1.400995000 | -0.820215000 | -4.398396000 |
| 1 | -0.873948000 | 0.098025000  | -4.677453000 |
| 1 | -0.863782000 | -1.664947000 | -4.843870000 |
| 1 | -2.398139000 | -0.789195000 | -4.849996000 |
| 6 | -2.319252000 | -2.617414000 | -2.075545000 |
| 1 | -3.392818000 | -2.548900000 | -2.280207000 |
| 1 | -1.924421000 | -3.450916000 | -2.661323000 |
| 1 | -2.204101000 | -2.854374000 | -1.014773000 |
| 1 | 3.668930000  | -2.022523000 | -0.912929000 |
| 1 | 2.333193000  | -2.815976000 | -0.083579000 |
| 1 | 0.429619000  | 0.116539000  | -2.009344000 |
| 1 | 0.184225000  | 1.194483000  | -0.106924000 |
| 6 | 0.713756000  | 2.975297000  | -1.968761000 |
| 8 | 0.560493000  | 3.887975000  | -1.265922000 |
| 8 | 0.859940000  | 2.099083000  | -2.729317000 |

## TS2

|    |              |              |              |
|----|--------------|--------------|--------------|
| 25 | -0.040449000 | 0.039392000  | 0.355024000  |
| 7  | 0.090435000  | -1.612789000 | -1.206611000 |
| 6  | -0.043192000 | 1.468998000  | 1.398354000  |
| 8  | -0.029858000 | 2.418112000  | 2.064598000  |
| 6  | -2.529285000 | -0.616897000 | -1.759645000 |
| 1  | -3.585884000 | -0.745134000 | -2.011397000 |
| 1  | -2.079793000 | -0.001233000 | -2.547607000 |
| 6  | 2.604038000  | -1.978665000 | 0.285920000  |
| 6  | -0.347889000 | -1.119548000 | 1.669763000  |
| 8  | -0.543448000 | -1.893951000 | 2.514725000  |
| 15 | 2.220556000  | -0.198873000 | 0.522434000  |
| 15 | -2.237618000 | 0.307172000  | -0.199419000 |
| 6  | -2.929931000 | 1.973722000  | -0.546092000 |
| 6  | -4.310670000 | 2.153543000  | -0.697185000 |
| 6  | -2.081655000 | 3.071065000  | -0.698513000 |
| 6  | -4.829179000 | 3.405586000  | -1.002275000 |
| 1  | -4.986282000 | 1.313493000  | -0.563111000 |
| 6  | -2.603161000 | 4.326236000  | -1.004678000 |
| 1  | -1.011471000 | 2.945217000  | -0.595119000 |
| 6  | -3.974226000 | 4.495916000  | -1.156907000 |
| 1  | -5.901429000 | 3.532783000  | -1.115249000 |
| 1  | -1.929870000 | 5.168864000  | -1.124336000 |
| 1  | -4.379845000 | 5.474939000  | -1.393165000 |
| 6  | -3.480388000 | -0.339956000 | 0.990319000  |
| 6  | -4.559290000 | -1.155089000 | 0.641356000  |
| 6  | -3.332070000 | 0.037719000  | 2.330006000  |
| 6  | -5.463163000 | -1.591651000 | 1.607297000  |
| 1  | -4.704555000 | -1.463799000 | -0.388645000 |
| 6  | -4.238038000 | -0.388393000 | 3.293354000  |
| 1  | -2.496437000 | 0.668295000  | 2.620170000  |
| 6  | -5.304911000 | -1.208958000 | 2.934697000  |

|    |              |              |              |
|----|--------------|--------------|--------------|
| 1  | -6.291846000 | -2.230975000 | 1.318847000  |
| 1  | -4.105932000 | -0.085741000 | 4.327183000  |
| 1  | -6.008404000 | -1.549548000 | 3.687862000  |
| 6  | 3.260002000  | 0.686429000  | -0.699629000 |
| 6  | 3.109768000  | 2.076023000  | -0.772698000 |
| 6  | 4.193164000  | 0.064800000  | -1.531979000 |
| 6  | 3.874793000  | 2.824914000  | -1.657423000 |
| 1  | 2.370934000  | 2.569176000  | -0.147981000 |
| 6  | 4.951986000  | 0.814324000  | -2.428968000 |
| 1  | 4.336552000  | -1.009578000 | -1.494199000 |
| 6  | 4.795629000  | 2.194480000  | -2.491572000 |
| 1  | 3.737041000  | 3.899797000  | -1.708666000 |
| 1  | 5.665743000  | 0.315480000  | -3.077162000 |
| 1  | 5.385266000  | 2.778258000  | -3.191343000 |
| 6  | 3.093718000  | 0.198835000  | 2.092071000  |
| 6  | 2.387265000  | 0.195615000  | 3.297613000  |
| 6  | 4.469943000  | 0.452171000  | 2.114712000  |
| 6  | 3.043043000  | 0.435697000  | 4.501965000  |
| 1  | 1.319643000  | 0.008583000  | 3.300332000  |
| 6  | 5.123694000  | 0.694224000  | 3.317672000  |
| 1  | 5.032599000  | 0.470019000  | 1.186143000  |
| 6  | 4.411125000  | 0.686322000  | 4.514412000  |
| 1  | 2.479364000  | 0.433460000  | 5.429473000  |
| 1  | 6.190864000  | 0.893431000  | 3.319948000  |
| 1  | 4.921248000  | 0.879794000  | 5.452978000  |
| 14 | 1.499834000  | -2.694712000 | -1.067787000 |
| 14 | -1.523249000 | -2.206560000 | -1.670977000 |
| 6  | 2.357382000  | -2.728368000 | -2.736661000 |
| 1  | 3.315767000  | -3.256388000 | -2.689089000 |
| 1  | 1.729999000  | -3.237798000 | -3.475692000 |
| 1  | 2.542279000  | -1.713429000 | -3.102164000 |
| 6  | 1.008674000  | -4.426179000 | -0.541916000 |
| 1  | 0.403382000  | -4.942525000 | -1.293149000 |
| 1  | 1.917452000  | -5.018220000 | -0.387038000 |
| 1  | 0.455825000  | -4.413479000 | 0.402265000  |
| 6  | -1.445884000 | -3.015660000 | -3.365637000 |
| 1  | -0.997445000 | -2.335423000 | -4.097033000 |
| 1  | -0.845171000 | -3.931620000 | -3.343895000 |
| 1  | -2.445246000 | -3.285594000 | -3.722793000 |
| 6  | -2.225269000 | -3.402125000 | -0.411358000 |
| 1  | -3.296838000 | -3.531953000 | -0.595692000 |
| 1  | -1.759272000 | -4.387592000 | -0.484628000 |
| 1  | -2.110978000 | -3.041027000 | 0.613819000  |
| 1  | 3.671505000  | -2.185193000 | 0.159999000  |
| 1  | 2.297481000  | -2.446635000 | 1.229288000  |
| 1  | 0.336738000  | -0.928269000 | -1.934182000 |
| 1  | 0.194513000  | 1.041016000  | -0.945031000 |
| 6  | 0.525528000  | 1.528242000  | -2.551794000 |
| 8  | 0.556999000  | 2.703388000  | -2.455026000 |
| 8  | 0.581948000  | 0.493244000  | -3.144204000 |

**I4**

|    |              |              |              |
|----|--------------|--------------|--------------|
| 25 | 0.033848000  | -0.177323000 | 0.229371000  |
| 7  | -0.109861000 | 1.926027000  | -0.445024000 |
| 6  | 0.077956000  | -1.930759000 | 0.552255000  |
| 8  | 0.106508000  | -3.066024000 | 0.767181000  |
| 6  | 2.539512000  | 1.339328000  | -1.369801000 |
| 1  | 3.591422000  | 1.590167000  | -1.533843000 |
| 1  | 2.099126000  | 1.102290000  | -2.346426000 |
| 6  | -2.595133000 | 1.648222000  | 1.107180000  |
| 6  | 0.352698000  | 0.282794000  | 1.911595000  |
| 8  | 0.541787000  | 0.642221000  | 2.997278000  |
| 15 | -2.244131000 | -0.065400000 | 0.569869000  |
| 15 | 2.280644000  | -0.160244000 | -0.353498000 |
| 6  | 3.012730000  | -1.538606000 | -1.317538000 |
| 6  | 4.398897000  | -1.738540000 | -1.339370000 |
| 6  | 2.189280000  | -2.378787000 | -2.070867000 |
| 6  | 4.949995000  | -2.759001000 | -2.104358000 |
| 1  | 5.050876000  | -1.102435000 | -0.748218000 |
| 6  | 2.746939000  | -3.397869000 | -2.839528000 |
| 1  | 1.114829000  | -2.236245000 | -2.095328000 |
| 6  | 4.123332000  | -3.591773000 | -2.856217000 |
| 1  | 6.025496000  | -2.906590000 | -2.111105000 |
| 1  | 2.094892000  | -4.036297000 | -3.426449000 |
| 1  | 4.554415000  | -4.389831000 | -3.452891000 |
| 6  | 3.451766000  | -0.041629000 | 1.051716000  |
| 6  | 4.483434000  | 0.895541000  | 1.129940000  |
| 6  | 3.313968000  | -0.979334000 | 2.082016000  |
| 6  | 5.349672000  | 0.907145000  | 2.220897000  |
| 1  | 4.620140000  | 1.627572000  | 0.341297000  |
| 6  | 4.182293000  | -0.974340000 | 3.166187000  |
| 1  | 2.520021000  | -1.719405000 | 2.033842000  |
| 6  | 5.200555000  | -0.026523000 | 3.240494000  |
| 1  | 6.142473000  | 1.646959000  | 2.270131000  |
| 1  | 4.060389000  | -1.707727000 | 3.956704000  |
| 1  | 5.875138000  | -0.017119000 | 4.090669000  |
| 6  | -3.304235000 | -0.364514000 | -0.888071000 |
| 6  | -3.110343000 | -1.560095000 | -1.587558000 |
| 6  | -4.302316000 | 0.516206000  | -1.313187000 |
| 6  | -3.896407000 | -1.866953000 | -2.690710000 |
| 1  | -2.320104000 | -2.241834000 | -1.288864000 |
| 6  | -5.086310000 | 0.210206000  | -2.421963000 |
| 1  | -4.473347000 | 1.450994000  | -0.790596000 |
| 6  | -4.884952000 | -0.981685000 | -3.110663000 |
| 1  | -3.716697000 | -2.786979000 | -3.235838000 |
| 1  | -5.851358000 | 0.907460000  | -2.748597000 |
| 1  | -5.490782000 | -1.215975000 | -3.980168000 |
| 6  | -3.049051000 | -1.106136000 | 1.851725000  |
| 6  | -2.297339000 | -1.624528000 | 2.909305000  |
| 6  | -4.426499000 | -1.351557000 | 1.815473000  |
| 6  | -2.909812000 | -2.367950000 | 3.914362000  |
| 1  | -1.227935000 | -1.454593000 | 2.953410000  |

|    |              |              |              |
|----|--------------|--------------|--------------|
| 6  | -5.036919000 | -2.095472000 | 2.818768000  |
| 1  | -5.023062000 | -0.969054000 | 0.992805000  |
| 6  | -4.279578000 | -2.605004000 | 3.870823000  |
| 1  | -2.311525000 | -2.766923000 | 4.727193000  |
| 1  | -6.105431000 | -2.281866000 | 2.776051000  |
| 1  | -4.756281000 | -3.189754000 | 4.651321000  |
| 14 | -1.539489000 | 2.847300000  | 0.093936000  |
| 14 | 1.474488000  | 2.717310000  | -0.642410000 |
| 6  | -2.429673000 | 3.458752000  | -1.436576000 |
| 1  | -3.415719000 | 3.871212000  | -1.198035000 |
| 1  | -1.844166000 | 4.246717000  | -1.922067000 |
| 1  | -2.551888000 | 2.647662000  | -2.160883000 |
| 6  | -1.104486000 | 4.280431000  | 1.225164000  |
| 1  | -0.515947000 | 5.053892000  | 0.722439000  |
| 1  | -2.033667000 | 4.747789000  | 1.569953000  |
| 1  | -0.554173000 | 3.944623000  | 2.109281000  |
| 6  | 1.332474000  | 4.118331000  | -1.883003000 |
| 1  | 0.873615000  | 3.751126000  | -2.806716000 |
| 1  | 0.715302000  | 4.937891000  | -1.499254000 |
| 1  | 2.315064000  | 4.532971000  | -2.131018000 |
| 6  | 2.162589000  | 3.338314000  | 0.987538000  |
| 1  | 3.222671000  | 3.585120000  | 0.867267000  |
| 1  | 1.652618000  | 4.246219000  | 1.318143000  |
| 1  | 2.087279000  | 2.592121000  | 1.782934000  |
| 1  | -3.662156000 | 1.890147000  | 1.128859000  |
| 1  | -2.235420000 | 1.694790000  | 2.142274000  |
| 1  | -0.344524000 | 1.639406000  | -1.435209000 |
| 1  | -0.263734000 | -0.506408000 | -1.503783000 |
| 6  | -0.479613000 | -0.278053000 | -2.682597000 |
| 8  | -0.553510000 | -1.308564000 | -3.322368000 |
| 8  | -0.555445000 | 0.936864000  | -2.925328000 |

### TS3

|    |              |              |              |
|----|--------------|--------------|--------------|
| 25 | 0.019176000  | -0.122152000 | 0.272225000  |
| 7  | -0.108002000 | 1.862505000  | -0.523570000 |
| 6  | 0.051411000  | -1.857213000 | 0.683781000  |
| 8  | 0.073221000  | -2.979281000 | 0.967569000  |
| 6  | 2.573808000  | 1.288112000  | -1.376529000 |
| 1  | 3.630589000  | 1.547670000  | -1.485597000 |
| 1  | 2.201508000  | 1.009980000  | -2.369858000 |
| 6  | -2.669844000 | 1.742422000  | 0.906980000  |
| 6  | 0.347503000  | 0.398447000  | 1.930634000  |
| 8  | 0.542415000  | 0.811758000  | 2.993680000  |
| 15 | -2.256959000 | -0.002258000 | 0.585415000  |
| 15 | 2.273575000  | -0.168568000 | -0.317956000 |
| 6  | 2.972050000  | -1.596996000 | -1.234709000 |
| 6  | 4.356162000  | -1.806061000 | -1.276170000 |
| 6  | 2.132823000  | -2.459953000 | -1.943189000 |
| 6  | 4.887845000  | -2.855880000 | -2.014665000 |
| 1  | 5.020882000  | -1.151236000 | -0.720266000 |
| 6  | 2.668575000  | -3.508720000 | -2.686628000 |



|    |              |              |              |
|----|--------------|--------------|--------------|
| 1  | 1.058538000  | -2.319197000 | -1.942422000 |
| 6  | 4.043608000  | -3.709710000 | -2.722150000 |
| 1  | 5.962222000  | -3.009616000 | -2.036456000 |
| 1  | 2.003161000  | -4.164829000 | -3.237872000 |
| 1  | 4.459529000  | -4.530010000 | -3.298860000 |
| 6  | 3.425769000  | -0.047270000 | 1.100496000  |
| 6  | 4.431301000  | 0.914621000  | 1.204955000  |
| 6  | 3.292203000  | -0.999107000 | 2.118915000  |
| 6  | 5.280138000  | 0.933481000  | 2.309706000  |
| 1  | 4.557413000  | 1.663016000  | 0.430602000  |
| 6  | 4.143332000  | -0.985524000 | 3.216211000  |
| 1  | 2.516750000  | -1.757026000 | 2.051300000  |
| 6  | 5.138263000  | -0.015160000 | 3.316005000  |
| 1  | 6.052598000  | 1.692702000  | 2.380353000  |
| 1  | 4.026376000  | -1.729887000 | 3.997175000  |
| 1  | 5.799338000  | 0.000575000  | 4.176626000  |
| 6  | -3.218028000 | -0.504905000 | -0.886059000 |
| 6  | -3.051139000 | -1.816523000 | -1.347441000 |
| 6  | -4.080202000 | 0.350998000  | -1.573267000 |
| 6  | -3.730482000 | -2.259907000 | -2.473589000 |
| 1  | -2.374787000 | -2.491083000 | -0.829241000 |
| 6  | -4.754551000 | -0.092609000 | -2.708662000 |
| 1  | -4.226407000 | 1.371702000  | -1.237953000 |
| 6  | -4.580604000 | -1.395915000 | -3.159949000 |
| 1  | -3.580127000 | -3.274027000 | -2.827756000 |
| 1  | -5.412773000 | 0.586353000  | -3.241303000 |
| 1  | -5.099958000 | -1.737489000 | -4.049446000 |
| 6  | -3.087186000 | -0.941282000 | 1.924039000  |
| 6  | -2.355173000 | -1.424588000 | 3.010595000  |
| 6  | -4.472693000 | -1.139296000 | 1.895238000  |
| 6  | -2.995770000 | -2.089858000 | 4.052915000  |
| 1  | -1.280505000 | -1.288377000 | 3.048209000  |
| 6  | -5.111010000 | -1.803969000 | 2.935294000  |
| 1  | -5.051991000 | -0.781442000 | 1.048830000  |
| 6  | -4.372722000 | -2.280470000 | 4.016825000  |
| 1  | -2.414079000 | -2.463231000 | 4.889578000  |
| 1  | -6.185408000 | -1.954497000 | 2.900217000  |
| 1  | -4.871240000 | -2.803269000 | 4.827077000  |
| 14 | -1.504440000 | 2.843156000  | -0.115685000 |
| 14 | 1.436938000  | 2.664919000  | -0.736232000 |
| 6  | -2.355392000 | 3.458065000  | -1.677657000 |
| 1  | -3.325285000 | 3.915559000  | -1.452116000 |
| 1  | -1.736028000 | 4.218775000  | -2.164921000 |
| 1  | -2.506272000 | 2.651493000  | -2.400454000 |
| 6  | -1.140657000 | 4.335793000  | 0.975171000  |
| 1  | -0.521280000 | 5.085725000  | 0.473021000  |
| 1  | -2.086084000 | 4.820696000  | 1.244250000  |
| 1  | -0.639241000 | 4.042175000  | 1.902819000  |
| 6  | 1.334844000  | 4.007914000  | -2.051938000 |
| 1  | 0.893669000  | 3.609024000  | -2.971148000 |
| 1  | 0.719417000  | 4.851798000  | -1.721386000 |

|   |              |              |              |
|---|--------------|--------------|--------------|
| 1 | 2.328098000  | 4.401357000  | -2.293126000 |
| 6 | 2.166087000  | 3.401016000  | 0.834977000  |
| 1 | 3.204332000  | 3.704294000  | 0.658756000  |
| 1 | 1.616593000  | 4.291976000  | 1.148977000  |
| 1 | 2.162739000  | 2.691328000  | 1.666868000  |
| 1 | -3.736299000 | 1.965246000  | 0.803772000  |
| 1 | -2.408053000 | 1.900350000  | 1.960481000  |
| 1 | -0.375676000 | 1.419239000  | -1.829493000 |
| 1 | -0.321296000 | -0.630539000 | -1.580616000 |
| 6 | -0.480801000 | -0.322679000 | -2.672990000 |
| 8 | -0.557110000 | -1.209796000 | -3.486547000 |
| 8 | -0.536696000 | 0.953153000  | -2.838101000 |

# I5

|    |              |              |              |
|----|--------------|--------------|--------------|
| 25 | -0.052302000 | -0.456563000 | -0.223250000 |
| 7  | 0.125643000  | 1.330248000  | -1.255954000 |
| 6  | -0.091089000 | -1.769457000 | 0.980736000  |
| 8  | -0.118266000 | -2.636139000 | 1.750402000  |
| 6  | -2.483904000 | 1.868281000  | -0.170550000 |
| 1  | -3.532623000 | 2.156413000  | -0.280569000 |
| 1  | -2.056662000 | 2.467409000  | 0.640678000  |
| 6  | 2.734809000  | 0.183342000  | -1.966552000 |
| 6  | -0.472008000 | -1.547307000 | -1.541769000 |
| 8  | -0.734226000 | -2.202195000 | -2.460078000 |
| 15 | 2.214234000  | -0.632495000 | -0.430077000 |
| 15 | -2.234043000 | 0.131525000  | 0.330402000  |
| 6  | -2.690526000 | 0.053014000  | 2.105118000  |
| 6  | -3.990807000 | -0.226856000 | 2.533804000  |
| 6  | -1.698415000 | 0.318139000  | 3.055241000  |
| 6  | -4.293693000 | -0.240989000 | 3.891980000  |
| 1  | -4.767746000 | -0.442196000 | 1.806421000  |
| 6  | -2.005517000 | 0.307525000  | 4.411898000  |
| 1  | -0.687345000 | 0.545563000  | 2.729478000  |
| 6  | -3.302382000 | 0.025563000  | 4.832497000  |
| 1  | -5.305768000 | -0.463440000 | 4.215507000  |
| 1  | -1.228279000 | 0.512912000  | 5.141492000  |
| 1  | -3.539903000 | 0.010219000  | 5.891689000  |
| 6  | -3.537528000 | -0.869125000 | -0.471724000 |
| 6  | -4.577215000 | -0.326262000 | -1.227859000 |
| 6  | -3.474757000 | -2.258589000 | -0.305517000 |
| 6  | -5.532721000 | -1.154794000 | -1.812487000 |
| 1  | -4.645599000 | 0.745310000  | -1.378164000 |
| 6  | -4.433237000 | -3.083402000 | -0.879874000 |
| 1  | -2.670921000 | -2.696151000 | 0.279810000  |
| 6  | -5.463827000 | -2.532466000 | -1.638814000 |
| 1  | -6.330835000 | -0.718729000 | -2.404895000 |
| 1  | -4.371121000 | -4.157980000 | -0.741561000 |
| 1  | -6.208448000 | -3.176922000 | -2.095196000 |
| 6  | 2.952228000  | 0.323620000  | 0.944371000  |
| 6  | 2.712466000  | -0.120321000 | 2.251855000  |
| 6  | 3.657736000  | 1.511827000  | 0.751829000  |

|    |              |              |              |
|----|--------------|--------------|--------------|
| 6  | 3.161202000  | 0.616807000  | 3.339599000  |
| 1  | 2.167413000  | -1.044970000 | 2.419660000  |
| 6  | 4.101915000  | 2.254641000  | 1.844126000  |
| 1  | 3.850199000  | 1.882739000  | -0.248411000 |
| 6  | 3.851727000  | 1.811584000  | 3.137849000  |
| 1  | 2.968100000  | 0.261619000  | 4.347037000  |
| 1  | 4.631290000  | 3.186945000  | 1.677760000  |
| 1  | 4.193814000  | 2.393275000  | 3.988094000  |
| 6  | 3.107888000  | -2.225782000 | -0.355216000 |
| 6  | 2.440169000  | -3.408714000 | -0.679693000 |
| 6  | 4.466039000  | -2.275537000 | -0.021972000 |
| 6  | 3.120596000  | -4.623685000 | -0.676637000 |
| 1  | 1.385403000  | -3.383663000 | -0.932765000 |
| 6  | 5.143173000  | -3.489208000 | -0.016323000 |
| 1  | 4.990852000  | -1.362128000 | 0.243860000  |
| 6  | 4.470711000  | -4.665031000 | -0.344447000 |
| 1  | 2.591618000  | -5.537349000 | -0.927962000 |
| 1  | 6.195821000  | -3.519116000 | 0.246930000  |
| 1  | 4.999832000  | -5.612871000 | -0.336847000 |
| 14 | 1.485211000  | 1.583556000  | -2.322840000 |
| 14 | -1.376090000 | 2.106240000  | -1.695551000 |
| 6  | 2.314445000  | 3.259005000  | -2.088023000 |
| 1  | 3.348663000  | 3.241096000  | -2.451486000 |
| 1  | 1.783388000  | 4.027481000  | -2.659112000 |
| 1  | 2.306304000  | 3.581479000  | -1.043039000 |
| 6  | 1.070119000  | 1.414018000  | -4.156253000 |
| 1  | 0.449305000  | 2.240003000  | -4.518482000 |
| 1  | 1.995110000  | 1.420289000  | -4.744496000 |
| 1  | 0.543513000  | 0.476211000  | -4.361904000 |
| 6  | -1.155468000 | 3.952966000  | -1.990669000 |
| 1  | -0.550849000 | 4.395429000  | -1.191331000 |
| 1  | -0.648862000 | 4.151728000  | -2.941436000 |
| 1  | -2.122128000 | 4.467209000  | -2.020899000 |
| 6  | -2.255848000 | 1.334183000  | -3.173266000 |
| 1  | -3.265164000 | 1.749642000  | -3.275680000 |
| 1  | -1.723824000 | 1.529448000  | -4.107947000 |
| 1  | -2.349940000 | 0.249457000  | -3.063176000 |
| 1  | 3.788818000  | 0.477805000  | -1.972265000 |
| 1  | 2.602404000  | -0.573130000 | -2.749234000 |
| 1  | 0.950004000  | 3.363159000  | 2.786434000  |
| 6  | 0.905358000  | 3.328306000  | 1.686584000  |
| 8  | 1.259636000  | 4.240322000  | 0.977312000  |
| 8  | 0.411049000  | 2.171385000  | 1.281176000  |
| 1  | 0.406289000  | 2.056783000  | 0.267968000  |

## 2<sub>Mn</sub>

|    |              |              |              |
|----|--------------|--------------|--------------|
| 15 | 2.246182000  | -0.212203000 | -0.031371000 |
| 7  | -0.039297000 | -0.487593000 | 1.831989000  |
| 6  | 1.123710000  | -1.326400000 | 2.199135000  |
| 6  | -1.293015000 | -1.231653000 | 2.083496000  |
| 6  | -2.515456000 | -0.513104000 | 1.518360000  |

|    |              |              |              |
|----|--------------|--------------|--------------|
| 6  | 2.442706000  | -0.704719000 | 1.745543000  |
| 1  | 3.272167000  | -1.397693000 | 1.922631000  |
| 1  | -2.719630000 | 0.397378000  | 2.094077000  |
| 15 | -2.126009000 | 0.002412000  | -0.221674000 |
| 1  | 2.639905000  | 0.204303000  | 2.323397000  |
| 1  | -3.397635000 | -1.156843000 | 1.596572000  |
| 1  | 1.136415000  | -1.523819000 | 3.281030000  |
| 1  | 0.983832000  | -2.286946000 | 1.694552000  |
| 1  | -1.182799000 | -2.198016000 | 1.582563000  |
| 1  | -1.418966000 | -1.431941000 | 3.157696000  |
| 6  | 3.714174000  | 0.859665000  | -0.412612000 |
| 1  | 4.612564000  | 0.228726000  | -0.381207000 |
| 6  | -3.486093000 | 1.187437000  | -0.658247000 |
| 1  | -3.310025000 | 1.393793000  | -1.722474000 |
| 6  | 3.549493000  | 1.434214000  | -1.825856000 |
| 1  | 3.453377000  | 0.654543000  | -2.586821000 |
| 1  | 2.656164000  | 2.064653000  | -1.876914000 |
| 1  | 4.418455000  | 2.047733000  | -2.086291000 |
| 6  | 3.862963000  | 1.998045000  | 0.603406000  |
| 1  | 4.128626000  | 1.634714000  | 1.600063000  |
| 1  | 4.657972000  | 2.679583000  | 0.282898000  |
| 1  | 2.937601000  | 2.578456000  | 0.678474000  |
| 6  | -3.337048000 | 2.506665000  | 0.107068000  |
| 1  | -3.510797000 | 2.365484000  | 1.180107000  |
| 1  | -2.343809000 | 2.942027000  | -0.021241000 |
| 1  | -4.078652000 | 3.230891000  | -0.246381000 |
| 6  | -4.892069000 | 0.601692000  | -0.498123000 |
| 1  | -5.644823000 | 1.322514000  | -0.835236000 |
| 1  | -5.025809000 | -0.315460000 | -1.078836000 |
| 1  | -5.106150000 | 0.373085000  | 0.551892000  |
| 1  | -0.034031000 | 0.347061000  | 2.413408000  |
| 6  | -2.439432000 | -1.466145000 | -1.290174000 |
| 1  | -3.333009000 | -2.037901000 | -1.018415000 |
| 1  | -2.589143000 | -1.064523000 | -2.299383000 |
| 6  | -1.176393000 | -2.330714000 | -1.253915000 |
| 1  | -1.130804000 | -2.938703000 | -2.174585000 |
| 6  | 2.510918000  | -1.741523000 | -1.026010000 |
| 1  | 3.302029000  | -2.389457000 | -0.632992000 |
| 1  | 2.818369000  | -1.406188000 | -2.021801000 |
| 6  | 1.161939000  | -2.462044000 | -1.119221000 |
| 1  | 1.146202000  | -3.076261000 | -2.036741000 |
| 7  | 0.034589000  | -1.540757000 | -1.087793000 |
| 25 | 0.083325000  | 0.195848000  | -0.215560000 |
| 1  | -1.282191000 | -3.071957000 | -0.431509000 |
| 1  | 1.094614000  | -3.196973000 | -0.287409000 |
| 6  | 0.200142000  | 1.947341000  | -0.015962000 |
| 8  | 0.304748000  | 3.115540000  | 0.051608000  |

# I1

|    |              |              |              |
|----|--------------|--------------|--------------|
| 15 | 2.225758000  | -0.206629000 | -0.026512000 |
| 7  | -0.055263000 | -0.362730000 | 1.800200000  |

|    |              |              |              |
|----|--------------|--------------|--------------|
| 6  | 1.142711000  | -1.053058000 | 2.326597000  |
| 6  | -1.262719000 | -1.168354000 | 2.064174000  |
| 6  | -2.505802000 | -0.521785000 | 1.460870000  |
| 6  | 2.424988000  | -0.417527000 | 1.800520000  |
| 1  | 3.296669000  | -1.021159000 | 2.075074000  |
| 1  | -2.771163000 | 0.383345000  | 2.020632000  |
| 15 | -2.116480000 | -0.017322000 | -0.279783000 |
| 1  | 2.553099000  | 0.578419000  | 2.237635000  |
| 1  | -3.356618000 | -1.207668000 | 1.521834000  |
| 1  | 1.132776000  | -1.063359000 | 3.425849000  |
| 1  | 1.084687000  | -2.091502000 | 1.992189000  |
| 1  | -1.090882000 | -2.142282000 | 1.601103000  |
| 1  | -1.396762000 | -1.328912000 | 3.144331000  |
| 6  | 3.731011000  | 0.736725000  | -0.565790000 |
| 1  | 4.597361000  | 0.074054000  | -0.437750000 |
| 6  | -3.493474000 | 1.137686000  | -0.742666000 |
| 1  | -3.338641000 | 1.299427000  | -1.818171000 |
| 6  | 3.594710000  | 1.098956000  | -2.049384000 |
| 1  | 3.427599000  | 0.221707000  | -2.681296000 |
| 1  | 2.753744000  | 1.784362000  | -2.197296000 |
| 1  | 4.504567000  | 1.595668000  | -2.402117000 |
| 6  | 3.938634000  | 2.001924000  | 0.274301000  |
| 1  | 4.207506000  | 1.771929000  | 1.308882000  |
| 1  | 4.751321000  | 2.601557000  | -0.149030000 |
| 1  | 3.035969000  | 2.621926000  | 0.283600000  |
| 6  | -3.341591000 | 2.488327000  | -0.035442000 |
| 1  | -3.479671000 | 2.387756000  | 1.047298000  |
| 1  | -2.358479000 | 2.931132000  | -0.207653000 |
| 1  | -4.103065000 | 3.188920000  | -0.394095000 |
| 6  | -4.892786000 | 0.551672000  | -0.532009000 |
| 1  | -5.655089000 | 1.253061000  | -0.887837000 |
| 1  | -5.031651000 | -0.390866000 | -1.068523000 |
| 1  | -5.087280000 | 0.369639000  | 0.530733000  |
| 1  | -0.149351000 | 0.518093000  | 2.302266000  |
| 6  | -2.401150000 | -1.523954000 | -1.294839000 |
| 1  | -3.358602000 | -2.014210000 | -1.089416000 |
| 1  | -2.402855000 | -1.187206000 | -2.338091000 |
| 6  | -1.210567000 | -2.453228000 | -1.042023000 |
| 1  | -1.150997000 | -3.185715000 | -1.871630000 |
| 6  | 2.451281000  | -1.889835000 | -0.739709000 |
| 1  | 3.255800000  | -2.449344000 | -0.248819000 |
| 1  | 2.736544000  | -1.739456000 | -1.786235000 |
| 6  | 1.100680000  | -2.615573000 | -0.683570000 |
| 1  | 1.113946000  | -3.421816000 | -1.443675000 |
| 7  | 0.009736000  | -1.707871000 | -0.898868000 |
| 25 | 0.085416000  | 0.295752000  | -0.292048000 |
| 1  | -1.454837000 | -3.082252000 | -0.147822000 |
| 1  | 1.033374000  | -3.170426000 | 0.287502000  |
| 6  | 0.184909000  | 1.994586000  | 0.181339000  |
| 8  | 0.264498000  | 3.111147000  | 0.523115000  |
| 1  | 0.591035000  | 0.593445000  | -1.855358000 |

|   |              |             |              |
|---|--------------|-------------|--------------|
| 1 | -0.226916000 | 0.692852000 | -1.886953000 |
|---|--------------|-------------|--------------|

**TS1**

|    |              |              |              |
|----|--------------|--------------|--------------|
| 15 | 2.232922000  | -0.194931000 | -0.022285000 |
| 7  | -0.040987000 | -0.457870000 | 1.828778000  |
| 6  | 1.124213000  | -1.267220000 | 2.242208000  |
| 6  | -1.296770000 | -1.178020000 | 2.121157000  |
| 6  | -2.513115000 | -0.467140000 | 1.532409000  |
| 6  | 2.437211000  | -0.651216000 | 1.763391000  |
| 1  | 3.272214000  | -1.335427000 | 1.949054000  |
| 1  | -2.714270000 | 0.457679000  | 2.086192000  |
| 15 | -2.115709000 | 0.009040000  | -0.216578000 |
| 1  | 2.634136000  | 0.271644000  | 2.319367000  |
| 1  | -3.399811000 | -1.103495000 | 1.620697000  |
| 1  | 1.137280000  | -1.409981000 | 3.332954000  |
| 1  | 0.995554000  | -2.253929000 | 1.788926000  |
| 1  | -1.199913000 | -2.167431000 | 1.665604000  |
| 1  | -1.421084000 | -1.328992000 | 3.203870000  |
| 6  | 3.726452000  | 0.825049000  | -0.440431000 |
| 1  | 4.612585000  | 0.180747000  | -0.362641000 |
| 6  | -3.491894000 | 1.152460000  | -0.707635000 |
| 1  | -3.310777000 | 1.317988000  | -1.778053000 |
| 6  | 3.593188000  | 1.330758000  | -1.882738000 |
| 1  | 3.515054000  | 0.514850000  | -2.606840000 |
| 1  | 2.699659000  | 1.954032000  | -1.985511000 |
| 1  | 4.468480000  | 1.931188000  | -2.152477000 |
| 6  | 3.879638000  | 2.008992000  | 0.521573000  |
| 1  | 4.119019000  | 1.689812000  | 1.539827000  |
| 1  | 4.694219000  | 2.658405000  | 0.184063000  |
| 1  | 2.964889000  | 2.609801000  | 0.552210000  |
| 6  | -3.358993000 | 2.502285000  | 0.005547000  |
| 1  | -3.534176000 | 2.401205000  | 1.082916000  |
| 1  | -2.369649000 | 2.942007000  | -0.136369000 |
| 1  | -4.106739000 | 3.204457000  | -0.378053000 |
| 6  | -4.893269000 | 0.561176000  | -0.529635000 |
| 1  | -5.650306000 | 1.264076000  | -0.893845000 |
| 1  | -5.020195000 | -0.376514000 | -1.077931000 |
| 1  | -5.108546000 | 0.368714000  | 0.527325000  |
| 1  | 0.170134000  | 0.511656000  | -1.899627000 |
| 1  | -0.035466000 | 0.408465000  | 2.362421000  |
| 6  | -2.427322000 | -1.511125000 | -1.224765000 |
| 1  | -3.348180000 | -2.038052000 | -0.954270000 |
| 1  | -2.536252000 | -1.155822000 | -2.256506000 |
| 6  | -1.207414000 | -2.433120000 | -1.116283000 |
| 1  | -1.207165000 | -3.128876000 | -1.975290000 |
| 6  | 2.491701000  | -1.770917000 | -0.958064000 |
| 1  | 3.322046000  | -2.370788000 | -0.569866000 |
| 1  | 2.747841000  | -1.473667000 | -1.980327000 |
| 6  | 1.176431000  | -2.559660000 | -0.970423000 |
| 1  | 1.194542000  | -3.270492000 | -1.816687000 |
| 7  | 0.027114000  | -1.685086000 | -1.040633000 |

|    |              |              |              |
|----|--------------|--------------|--------------|
| 1  | 0.123608000  | -0.468790000 | -1.759941000 |
| 25 | 0.084701000  | 0.270249000  | -0.231316000 |
| 1  | -1.331026000 | -3.082929000 | -0.224169000 |
| 1  | 1.131301000  | -3.198943000 | -0.063508000 |
| 6  | 0.184810000  | 1.999237000  | 0.079827000  |
| 8  | 0.270397000  | 3.157625000  | 0.236061000  |

## I2

|    |              |              |              |
|----|--------------|--------------|--------------|
| 15 | 2.207701000  | -0.167849000 | -0.016699000 |
| 7  | -0.048948000 | -0.502113000 | 1.817860000  |
| 6  | 1.124814000  | -1.266688000 | 2.279497000  |
| 6  | -1.317781000 | -1.172444000 | 2.155838000  |
| 6  | -2.518830000 | -0.458366000 | 1.531331000  |
| 6  | 2.429679000  | -0.646872000 | 1.773607000  |
| 1  | 3.271236000  | -1.325640000 | 1.952390000  |
| 1  | -2.719458000 | 0.472588000  | 2.075101000  |
| 15 | -2.089256000 | 0.023521000  | -0.221208000 |
| 1  | 2.629024000  | 0.275718000  | 2.329130000  |
| 1  | -3.413763000 | -1.084433000 | 1.615383000  |
| 1  | 1.138121000  | -1.353554000 | 3.376599000  |
| 1  | 1.017590000  | -2.282925000 | 1.886487000  |
| 1  | -1.250912000 | -2.192980000 | 1.764194000  |
| 1  | -1.444168000 | -1.261253000 | 3.245627000  |
| 6  | 3.723971000  | 0.827625000  | -0.417358000 |
| 1  | 4.609273000  | 0.196120000  | -0.260232000 |
| 6  | -3.481734000 | 1.138979000  | -0.731858000 |
| 1  | -3.304101000 | 1.277664000  | -1.806473000 |
| 6  | 3.659530000  | 1.263085000  | -1.886921000 |
| 1  | 3.687152000  | 0.413674000  | -2.575778000 |
| 1  | 2.734369000  | 1.815720000  | -2.076596000 |
| 1  | 4.512837000  | 1.907364000  | -2.124561000 |
| 6  | 3.816110000  | 2.059934000  | 0.491163000  |
| 1  | 3.979530000  | 1.794774000  | 1.539691000  |
| 1  | 4.657945000  | 2.687434000  | 0.179809000  |
| 1  | 2.904673000  | 2.662167000  | 0.425046000  |
| 6  | -3.341759000 | 2.506976000  | -0.055489000 |
| 1  | -3.499230000 | 2.432976000  | 1.027015000  |
| 1  | -2.354924000 | 2.942224000  | -0.224956000 |
| 1  | -4.097477000 | 3.197210000  | -0.445484000 |
| 6  | -4.881904000 | 0.553747000  | -0.528934000 |
| 1  | -5.640569000 | 1.245744000  | -0.910467000 |
| 1  | -5.014478000 | -0.400148000 | -1.047991000 |
| 1  | -5.092618000 | 0.393742000  | 0.534317000  |
| 1  | 0.169994000  | 0.769854000  | -1.776313000 |
| 1  | -0.036652000 | 0.410097000  | 2.266465000  |
| 6  | -2.430749000 | -1.524102000 | -1.201679000 |
| 1  | -3.342898000 | -2.048669000 | -0.898194000 |
| 1  | -2.568027000 | -1.196869000 | -2.239143000 |
| 6  | -1.226782000 | -2.462743000 | -1.107264000 |
| 1  | -1.264433000 | -3.218599000 | -1.906762000 |
| 6  | 2.504827000  | -1.766372000 | -0.928996000 |

|    |              |              |              |
|----|--------------|--------------|--------------|
| 1  | 3.327248000  | -2.357928000 | -0.511883000 |
| 1  | 2.784339000  | -1.493239000 | -1.951715000 |
| 6  | 1.211325000  | -2.583296000 | -0.957020000 |
| 1  | 1.261514000  | -3.355433000 | -1.740145000 |
| 7  | 0.038416000  | -1.716571000 | -1.139340000 |
| 1  | 0.117040000  | -1.206114000 | -2.019801000 |
| 25 | 0.083662000  | 0.297684000  | -0.230126000 |
| 1  | -1.256549000 | -3.012720000 | -0.159343000 |
| 1  | 1.079181000  | -3.113646000 | -0.006942000 |
| 6  | 0.170588000  | 2.008093000  | 0.110155000  |
| 8  | 0.247108000  | 3.174669000  | 0.235151000  |

### I3

|    |              |              |              |
|----|--------------|--------------|--------------|
| 15 | 2.034317000  | -0.708557000 | -0.016098000 |
| 7  | -0.455472000 | -2.223572000 | 0.264994000  |
| 6  | 0.632356000  | -3.085831000 | -0.233562000 |
| 6  | -1.768639000 | -2.611595000 | -0.281389000 |
| 6  | -2.864846000 | -1.622907000 | 0.123848000  |
| 6  | 2.001154000  | -2.561616000 | 0.204656000  |
| 1  | 2.802255000  | -3.085275000 | -0.329074000 |
| 1  | -3.125904000 | -1.772354000 | 1.178464000  |
| 15 | -2.197416000 | 0.114729000  | -0.024446000 |
| 1  | 2.135701000  | -2.758107000 | 1.273607000  |
| 1  | -3.770770000 | -1.804093000 | -0.464573000 |
| 1  | 0.495272000  | -4.128244000 | 0.091535000  |
| 1  | 0.564795000  | -3.087583000 | -1.326100000 |
| 1  | -1.667051000 | -2.624684000 | -1.371586000 |
| 1  | -2.039691000 | -3.634360000 | 0.021681000  |
| 6  | 3.623751000  | -0.191645000 | 0.796258000  |
| 1  | 4.455749000  | -0.687269000 | 0.277453000  |
| 6  | -3.482869000 | 1.162403000  | 0.807853000  |
| 1  | -3.161515000 | 2.184269000  | 0.566505000  |
| 6  | 3.781062000  | 1.328607000  | 0.673737000  |
| 1  | 3.831783000  | 1.660028000  | -0.368253000 |
| 1  | 2.937534000  | 1.834808000  | 1.152676000  |
| 1  | 4.704646000  | 1.652158000  | 1.165285000  |
| 6  | 3.636210000  | -0.599271000 | 2.274860000  |
| 1  | 3.662654000  | -1.684385000 | 2.408415000  |
| 1  | 4.525975000  | -0.190021000 | 2.764954000  |
| 1  | 2.756000000  | -0.208089000 | 2.794816000  |
| 6  | -3.401988000 | 0.995225000  | 2.329039000  |
| 1  | -3.700807000 | -0.014557000 | 2.634269000  |
| 1  | -2.392134000 | 1.176620000  | 2.702308000  |
| 1  | -4.084950000 | 1.696584000  | 2.820118000  |
| 6  | -4.910518000 | 0.954441000  | 0.295331000  |
| 1  | -5.595941000 | 1.650986000  | 0.790219000  |
| 1  | -4.994325000 | 1.118866000  | -0.783010000 |
| 1  | -5.263940000 | -0.059655000 | 0.512594000  |
| 1  | 0.221515000  | 1.528634000  | 0.217288000  |
| 1  | -0.491939000 | -2.307118000 | 1.277511000  |
| 6  | -2.434016000 | 0.529693000  | -1.824168000 |



|    |              |              |              |
|----|--------------|--------------|--------------|
| 1  | -3.393659000 | 0.197717000  | -2.234288000 |
| 1  | -2.408453000 | 1.624154000  | -1.886836000 |
| 6  | -1.280013000 | -0.064104000 | -2.632168000 |
| 1  | -1.227147000 | 0.400773000  | -3.628219000 |
| 6  | 2.405152000  | -0.497544000 | -1.829224000 |
| 1  | 3.146238000  | -1.211077000 | -2.205960000 |
| 1  | 2.821646000  | 0.507277000  | -1.950151000 |
| 6  | 1.102762000  | -0.596146000 | -2.625235000 |
| 1  | 1.237371000  | -0.172976000 | -3.631980000 |
| 7  | -0.001771000 | 0.070426000  | -1.916677000 |
| 1  | 0.225721000  | 1.060182000  | -1.832079000 |
| 25 | -0.035842000 | -0.060143000 | 0.287833000  |
| 1  | -1.453187000 | -1.133670000 | -2.797184000 |
| 1  | 0.818770000  | -1.645562000 | -2.762317000 |
| 6  | 0.042260000  | 0.197923000  | 2.013844000  |
| 8  | 0.127883000  | 0.469093000  | 3.154171000  |
| 6  | 1.362842000  | 3.399644000  | -0.788557000 |
| 8  | 1.371954000  | 2.897316000  | -1.847972000 |
| 8  | 1.413044000  | 4.005514000  | 0.201961000  |

## TS2

|    |              |              |              |
|----|--------------|--------------|--------------|
| 15 | -2.098983000 | -0.598113000 | -0.021529000 |
| 7  | 0.319330000  | -2.144993000 | -0.618882000 |
| 6  | -0.794817000 | -3.032895000 | -0.234918000 |
| 6  | 1.625688000  | -2.677333000 | -0.187407000 |
| 6  | 2.757461000  | -1.680416000 | -0.447606000 |
| 6  | -2.148593000 | -2.389152000 | -0.539800000 |
| 1  | -2.959297000 | -2.960181000 | -0.073715000 |
| 1  | 2.987164000  | -1.652464000 | -1.519503000 |
| 15 | 2.177807000  | 0.029095000  | 0.022951000  |
| 1  | -2.317509000 | -2.403232000 | -1.621711000 |
| 1  | 3.666894000  | -1.999827000 | 0.072424000  |
| 1  | -0.711931000 | -4.011517000 | -0.731089000 |
| 1  | -0.701109000 | -3.218026000 | 0.839616000  |
| 1  | 1.548370000  | -2.877074000 | 0.886160000  |
| 1  | 1.840906000  | -3.641534000 | -0.672024000 |
| 6  | -3.672872000 | 0.113977000  | -0.704094000 |
| 1  | -4.517960000 | -0.409813000 | -0.236744000 |
| 6  | 3.490909000  | 1.155396000  | -0.645846000 |
| 1  | 3.218745000  | 2.130643000  | -0.220912000 |
| 6  | -3.743608000 | 1.605810000  | -0.356206000 |
| 1  | -3.720186000 | 1.787577000  | 0.722600000  |
| 1  | -2.903191000 | 2.141830000  | -0.806610000 |
| 1  | -4.673947000 | 2.036166000  | -0.741538000 |
| 6  | -3.743874000 | -0.071342000 | -2.224950000 |
| 1  | -3.842427000 | -1.121487000 | -2.513965000 |
| 1  | -4.616402000 | 0.458051000  | -2.621844000 |
| 1  | -2.853306000 | 0.340138000  | -2.710653000 |
| 6  | 3.375978000  | 1.262337000  | -2.170229000 |
| 1  | 3.625104000  | 0.311393000  | -2.655676000 |
| 1  | 2.368872000  | 1.547453000  | -2.480717000 |

|    |              |              |              |
|----|--------------|--------------|--------------|
| 1  | 4.079861000  | 2.011799000  | -2.547154000 |
| 6  | 4.916832000  | 0.803626000  | -0.213211000 |
| 1  | 5.622723000  | 1.548891000  | -0.595258000 |
| 1  | 5.026639000  | 0.772345000  | 0.874756000  |
| 1  | 5.222148000  | -0.169428000 | -0.613724000 |
| 1  | -0.172356000 | 1.579703000  | 0.076457000  |
| 1  | 0.327817000  | -2.066425000 | -1.632450000 |
| 6  | 2.458336000  | 0.111677000  | 1.860319000  |
| 1  | 3.407280000  | -0.327916000 | 2.184917000  |
| 1  | 2.483192000  | 1.178218000  | 2.113931000  |
| 6  | 1.288453000  | -0.562732000 | 2.576532000  |
| 1  | 1.276317000  | -0.283120000 | 3.640500000  |
| 6  | -2.425421000 | -0.661470000 | 1.808808000  |
| 1  | -3.203772000 | -1.380718000 | 2.086226000  |
| 1  | -2.774055000 | 0.334798000  | 2.098785000  |
| 6  | -1.117493000 | -0.963835000 | 2.540758000  |
| 1  | -1.211471000 | -0.716940000 | 3.608625000  |
| 7  | 0.007359000  | -0.234196000 | 1.930002000  |
| 1  | -0.170478000 | 0.762943000  | 2.059028000  |
| 25 | 0.000281000  | 0.002156000  | -0.260904000 |
| 1  | 1.406965000  | -1.651575000 | 2.541904000  |
| 1  | -0.887902000 | -2.033678000 | 2.485787000  |
| 6  | -0.092229000 | 0.528672000  | -1.927900000 |
| 8  | -0.182709000 | 0.966723000  | -3.012830000 |
| 6  | -0.903504000 | 3.083647000  | 1.076756000  |
| 8  | -0.948957000 | 2.596718000  | 2.155553000  |
| 8  | -0.990256000 | 3.856923000  | 0.202396000  |

#### I4

|    |              |              |              |
|----|--------------|--------------|--------------|
| 15 | -2.323225000 | -0.219258000 | 0.035244000  |
| 7  | -0.186024000 | -1.567462000 | -1.484154000 |
| 6  | -1.358468000 | -2.446321000 | -1.297486000 |
| 6  | 1.069086000  | -2.347995000 | -1.577001000 |
| 6  | 2.305651000  | -1.453753000 | -1.483281000 |
| 6  | -2.643818000 | -1.632049000 | -1.130336000 |
| 1  | -3.468060000 | -2.278756000 | -0.811599000 |
| 1  | 2.423955000  | -0.871101000 | -2.404480000 |
| 15 | 2.058269000  | -0.237054000 | -0.106039000 |
| 1  | -2.923500000 | -1.199115000 | -2.096644000 |
| 1  | 3.203704000  | -2.068484000 | -1.364445000 |
| 1  | -1.458899000 | -3.152354000 | -2.134615000 |
| 1  | -1.167520000 | -3.041448000 | -0.400290000 |
| 1  | 1.068125000  | -3.057931000 | -0.745211000 |
| 1  | 1.086736000  | -2.944216000 | -2.500077000 |
| 6  | -3.751187000 | 0.944980000  | -0.169112000 |
| 1  | -4.663295000 | 0.434064000  | 0.166696000  |
| 6  | 3.474265000  | 0.943023000  | -0.203475000 |
| 1  | 3.407986000  | 1.482678000  | 0.749294000  |
| 6  | -3.503473000 | 2.176768000  | 0.712844000  |
| 1  | -3.410711000 | 1.924349000  | 1.772730000  |
| 1  | -2.583753000 | 2.687568000  | 0.410672000  |

|            |              |              |              |
|------------|--------------|--------------|--------------|
| 1          | -4.335847000 | 2.880537000  | 0.612518000  |
| 6          | -3.919504000 | 1.366754000  | -1.633566000 |
| 1          | -4.237458000 | 0.538885000  | -2.273594000 |
| 1          | -4.684971000 | 2.145767000  | -1.706848000 |
| 1          | -2.987807000 | 1.778344000  | -2.034810000 |
| 6          | 3.228358000  | 1.966917000  | -1.315357000 |
| 1          | 3.128527000  | 1.491619000  | -2.298690000 |
| 1          | 2.325930000  | 2.542810000  | -1.102513000 |
| 1          | 4.072863000  | 2.661520000  | -1.370606000 |
| 6          | 4.838989000  | 0.260893000  | -0.321603000 |
| 1          | 5.636909000  | 1.008285000  | -0.264941000 |
| 1          | 5.010919000  | -0.467102000 | 0.477604000  |
| 1          | 4.943659000  | -0.255952000 | -1.282327000 |
| 1          | -0.315452000 | 1.543282000  | 0.950485000  |
| 1          | -0.306218000 | -1.080478000 | -2.369210000 |
| 6          | 2.362599000  | -1.187053000 | 1.454826000  |
| 1          | 3.206982000  | -1.880648000 | 1.390044000  |
| 1          | 2.593252000  | -0.427030000 | 2.208896000  |
| 6          | 1.085002000  | -1.919611000 | 1.868696000  |
| 1          | 1.159169000  | -2.227347000 | 2.921764000  |
| 6          | -2.568664000 | -0.936884000 | 1.724571000  |
| 1          | -3.481362000 | -1.535780000 | 1.813357000  |
| 1          | -2.657191000 | -0.087307000 | 2.409636000  |
| 6          | -1.330676000 | -1.754013000 | 2.093206000  |
| 1          | -1.309379000 | -1.943671000 | 3.175561000  |
| 7          | -0.100662000 | -1.069230000 | 1.661535000  |
| 1          | 0.044918000  | -0.223262000 | 2.267310000  |
| 25         | -0.144271000 | 0.143393000  | -0.145293000 |
| 1          | 0.955455000  | -2.837692000 | 1.282887000  |
| 1          | -1.371478000 | -2.736088000 | 1.607126000  |
| 6          | -0.187379000 | 1.305885000  | -1.480557000 |
| 8          | -0.243460000 | 2.062552000  | -2.364929000 |
| 6          | 0.576716000  | 1.912172000  | 1.669505000  |
| 8          | 0.631090000  | 1.273859000  | 2.745792000  |
| 8          | 1.189462000  | 2.877897000  | 1.234844000  |
| <b>3Fe</b> |              |              |              |
| 15         | -2.169893000 | 0.176485000  | 0.116763000  |
| 7          | -0.106702000 | -0.904678000 | -1.450353000 |
| 6          | -1.301302000 | -1.699437000 | -1.662769000 |
| 6          | 1.049174000  | -1.689163000 | -1.839886000 |
| 6          | 2.359954000  | -0.909281000 | -1.664851000 |
| 6          | -2.579797000 | -0.926549000 | -1.306995000 |
| 1          | -3.428875000 | -1.594236000 | -1.125614000 |
| 1          | 2.501976000  | -0.229257000 | -2.513364000 |
| 15         | 2.156134000  | 0.180131000  | -0.187899000 |
| 1          | -2.847160000 | -0.260146000 | -2.135241000 |
| 1          | 3.229302000  | -1.573856000 | -1.616270000 |
| 1          | -1.375201000 | -2.046230000 | -2.709271000 |
| 1          | -1.277912000 | -2.633741000 | -1.056207000 |
| 1          | 1.120047000  | -2.628064000 | -1.244215000 |
| 1          | 0.973803000  | -2.027750000 | -2.888990000 |

|    |              |              |              |
|----|--------------|--------------|--------------|
| 6  | -3.520869000 | 1.435700000  | 0.206750000  |
| 1  | -3.345511000 | 1.936114000  | 1.168044000  |
| 6  | 3.526121000  | 1.420478000  | -0.304431000 |
| 1  | 3.324932000  | 1.928179000  | -1.257344000 |
| 6  | -3.325133000 | 2.473511000  | -0.903191000 |
| 1  | -2.315832000 | 2.892930000  | -0.867359000 |
| 1  | -3.476138000 | 2.029880000  | -1.893820000 |
| 1  | -4.048359000 | 3.288688000  | -0.794607000 |
| 6  | -4.930462000 | 0.839762000  | 0.198284000  |
| 1  | -5.077453000 | 0.119546000  | 1.009417000  |
| 1  | -5.680852000 | 1.629323000  | 0.314089000  |
| 1  | -5.134275000 | 0.328111000  | -0.748514000 |
| 6  | 4.924044000  | 0.799143000  | -0.363174000 |
| 1  | 5.159442000  | 0.272282000  | 0.568346000  |
| 1  | 5.023724000  | 0.088442000  | -1.188970000 |
| 1  | 5.682495000  | 1.577736000  | -0.498737000 |
| 6  | 3.403498000  | 2.458208000  | 0.815747000  |
| 1  | 4.101642000  | 3.284575000  | 0.645198000  |
| 1  | 2.385623000  | 2.852904000  | 0.872219000  |
| 1  | 3.651242000  | 2.019603000  | 1.789532000  |
| 26 | -0.009988000 | 0.401499000  | -0.028644000 |
| 6  | 2.569668000  | -0.844211000 | 1.301351000  |
| 1  | 2.842534000  | -0.153904000 | 2.107873000  |
| 1  | 3.415799000  | -1.520610000 | 1.144192000  |
| 6  | 1.323538000  | -1.639431000 | 1.686833000  |
| 1  | 1.158187000  | -2.431710000 | 0.949900000  |
| 1  | 1.454080000  | -2.122611000 | 2.666084000  |
| 6  | -2.379330000 | -0.824939000 | 1.660816000  |
| 1  | -3.244593000 | -1.495206000 | 1.638717000  |
| 1  | -2.527871000 | -0.116194000 | 2.484286000  |
| 6  | -1.096660000 | -1.627302000 | 1.873981000  |
| 1  | -1.046611000 | -2.430067000 | 1.131497000  |
| 1  | -1.087278000 | -2.097740000 | 2.867856000  |
| 7  | 0.109626000  | -0.797809000 | 1.673196000  |
| 1  | 0.030121000  | 1.742604000  | 0.831520000  |
| 1  | 0.169905000  | -0.099337000 | 2.410854000  |

## I1

|    |              |              |              |
|----|--------------|--------------|--------------|
| 15 | 2.169757000  | 0.168967000  | -0.133016000 |
| 7  | 0.103324000  | -0.911357000 | 1.483503000  |
| 6  | 1.290394000  | -1.701295000 | 1.649605000  |
| 6  | -1.055121000 | -1.685985000 | 1.828583000  |
| 6  | -2.341939000 | -0.860189000 | 1.684616000  |
| 6  | 2.553335000  | -0.887074000 | 1.330391000  |
| 1  | 3.434559000  | -1.522840000 | 1.191656000  |
| 1  | -2.420899000 | -0.154586000 | 2.520434000  |
| 15 | -2.161446000 | 0.178657000  | 0.171954000  |
| 1  | 2.758199000  | -0.196055000 | 2.156471000  |
| 1  | -3.239108000 | -1.488853000 | 1.682491000  |
| 1  | 1.383191000  | -2.091409000 | 2.682446000  |
| 1  | 1.301023000  | -2.622672000 | 1.012543000  |

|    |              |              |              |
|----|--------------|--------------|--------------|
| 1  | -1.167615000 | -2.612981000 | 1.209859000  |
| 1  | -1.001798000 | -2.065463000 | 2.868225000  |
| 6  | 3.556889000  | 1.386106000  | -0.278034000 |
| 1  | 3.404602000  | 1.841997000  | -1.265098000 |
| 6  | -3.548675000 | 1.403543000  | 0.240870000  |
| 1  | -3.353521000 | 1.953409000  | 1.171721000  |
| 6  | 3.392153000  | 2.485084000  | 0.776961000  |
| 1  | 2.412553000  | 2.963114000  | 0.694866000  |
| 1  | 3.491301000  | 2.081421000  | 1.790904000  |
| 1  | 4.163384000  | 3.252340000  | 0.651620000  |
| 6  | 4.949376000  | 0.752355000  | -0.227424000 |
| 1  | 5.078698000  | -0.018709000 | -0.993211000 |
| 1  | 5.721353000  | 1.512849000  | -0.387309000 |
| 1  | 5.136019000  | 0.293059000  | 0.749042000  |
| 6  | -4.939576000 | 0.770005000  | 0.328516000  |
| 1  | -5.170298000 | 0.201609000  | -0.579326000 |
| 1  | -5.030181000 | 0.094323000  | 1.183879000  |
| 1  | -5.706137000 | 1.545552000  | 0.432173000  |
| 6  | -3.442223000 | 2.393907000  | -0.923463000 |
| 1  | -4.154846000 | 3.214825000  | -0.790713000 |
| 1  | -2.432016000 | 2.804549000  | -1.000013000 |
| 1  | -3.679490000 | 1.908022000  | -1.876991000 |
| 26 | 0.004195000  | 0.490342000  | -0.012819000 |
| 6  | -2.568318000 | -0.924967000 | -1.257431000 |
| 1  | -2.833880000 | -0.279916000 | -2.102920000 |
| 1  | -3.418478000 | -1.586167000 | -1.062390000 |
| 6  | -1.324415000 | -1.745619000 | -1.590662000 |
| 1  | -1.178190000 | -2.516598000 | -0.829617000 |
| 1  | -1.442223000 | -2.254810000 | -2.558477000 |
| 6  | 2.371820000  | -0.918652000 | -1.615773000 |
| 1  | 3.241659000  | -1.580420000 | -1.554367000 |
| 1  | 2.513430000  | -0.257977000 | -2.479420000 |
| 6  | 1.094642000  | -1.739749000 | -1.777546000 |
| 1  | 1.062706000  | -2.520850000 | -1.013448000 |
| 1  | 1.072132000  | -2.236695000 | -2.758452000 |
| 7  | -0.109499000 | -0.909041000 | -1.584765000 |
| 1  | -0.055173000 | 1.628194000  | -1.105358000 |
| 1  | -0.169566000 | -0.232088000 | -2.342449000 |
| 1  | 0.032656000  | 1.945420000  | 0.771818000  |
| 1  | 0.125413000  | 1.413136000  | 1.372189000  |

# TS1

|    |              |              |              |
|----|--------------|--------------|--------------|
| 15 | 2.145503000  | 0.182310000  | -0.154557000 |
| 7  | 0.110214000  | -0.873325000 | 1.643780000  |
| 6  | 1.330537000  | -1.700964000 | 1.667380000  |
| 6  | -1.095699000 | -1.698383000 | 1.845073000  |
| 6  | -2.374085000 | -0.883532000 | 1.649207000  |
| 6  | 2.570459000  | -0.885863000 | 1.300464000  |
| 1  | 3.422771000  | -1.549638000 | 1.123055000  |
| 1  | -2.524052000 | -0.203516000 | 2.496407000  |
| 15 | -2.152970000 | 0.176823000  | 0.145704000  |

|    |              |              |              |
|----|--------------|--------------|--------------|
| 1  | 2.838161000  | -0.215902000 | 2.125775000  |
| 1  | -3.243040000 | -1.547700000 | 1.598530000  |
| 1  | 1.459929000  | -2.187307000 | 2.645717000  |
| 1  | 1.183680000  | -2.494086000 | 0.927775000  |
| 1  | -1.055261000 | -2.496832000 | 1.097770000  |
| 1  | -1.086475000 | -2.177913000 | 2.835163000  |
| 6  | 3.516406000  | 1.420214000  | -0.261275000 |
| 1  | 3.310977000  | 1.939158000  | -1.207065000 |
| 6  | -3.515452000 | 1.420768000  | 0.260937000  |
| 1  | -3.344562000 | 1.896601000  | 1.235529000  |
| 6  | 3.388312000  | 2.442980000  | 0.872238000  |
| 1  | 2.370189000  | 2.836876000  | 0.927041000  |
| 1  | 3.628978000  | 1.990438000  | 1.841481000  |
| 1  | 4.088371000  | 3.270753000  | 0.717093000  |
| 6  | 4.916418000  | 0.804845000  | -0.326726000 |
| 1  | 5.020914000  | 0.106320000  | -1.162278000 |
| 1  | 5.671863000  | 1.588329000  | -0.450395000 |
| 1  | 5.152888000  | 0.266127000  | 0.597686000  |
| 6  | -4.921739000 | 0.817380000  | 0.236040000  |
| 1  | -5.125342000 | 0.335662000  | -0.726364000 |
| 1  | -5.064183000 | 0.071110000  | 1.024082000  |
| 1  | -5.675531000 | 1.599326000  | 0.378104000  |
| 6  | -3.324919000 | 2.489494000  | -0.820353000 |
| 1  | -4.054281000 | 3.296023000  | -0.689846000 |
| 1  | -2.317417000 | 2.910706000  | -0.774567000 |
| 1  | -3.473582000 | 2.071268000  | -1.822465000 |
| 26 | -0.006374000 | 0.443806000  | -0.005695000 |
| 1  | 0.040569000  | 1.677143000  | 0.962549000  |
| 1  | 0.164454000  | -0.165145000 | 2.373011000  |
| 6  | -2.568087000 | -0.895088000 | -1.309518000 |
| 1  | -2.803683000 | -0.205600000 | -2.128878000 |
| 1  | -3.441520000 | -1.536955000 | -1.154054000 |
| 6  | -1.322847000 | -1.719481000 | -1.674780000 |
| 1  | -1.299685000 | -2.627998000 | -1.035643000 |
| 1  | -1.438065000 | -2.098237000 | -2.706730000 |
| 6  | 2.354794000  | -0.885157000 | -1.655889000 |
| 1  | 3.242624000  | -1.525642000 | -1.628090000 |
| 1  | 2.472885000  | -0.187836000 | -2.494329000 |
| 6  | 1.074463000  | -1.713641000 | -1.848505000 |
| 1  | 1.144897000  | -2.625501000 | -1.217761000 |
| 1  | 1.045426000  | -2.086456000 | -2.888672000 |
| 7  | -0.108424000 | -0.953351000 | -1.519843000 |
| 1  | -0.098357000 | 1.400055000  | -1.349247000 |
| 1  | -0.120708000 | 0.455733000  | -1.662850000 |

## I2

|    |              |              |              |
|----|--------------|--------------|--------------|
| 15 | 2.117866000  | 0.204926000  | -0.146975000 |
| 7  | 0.111558000  | -0.941342000 | 1.606848000  |
| 6  | 1.351844000  | -1.726601000 | 1.685951000  |
| 6  | -1.101917000 | -1.734970000 | 1.848839000  |
| 6  | -2.366684000 | -0.895457000 | 1.633857000  |

|    |              |              |              |
|----|--------------|--------------|--------------|
| 6  | 2.571246000  | -0.880036000 | 1.303115000  |
| 1  | 3.440240000  | -1.523154000 | 1.127425000  |
| 1  | -2.514870000 | -0.224006000 | 2.488316000  |
| 15 | -2.117878000 | 0.204894000  | 0.146964000  |
| 1  | 2.824520000  | -0.204474000 | 2.128672000  |
| 1  | -3.245918000 | -1.545705000 | 1.571320000  |
| 1  | 1.486466000  | -2.166597000 | 2.686061000  |
| 1  | 1.247079000  | -2.563800000 | 0.986297000  |
| 1  | -1.085915000 | -2.570518000 | 1.139547000  |
| 1  | -1.099642000 | -2.177251000 | 2.857018000  |
| 6  | 3.506779000  | 1.421607000  | -0.270291000 |
| 1  | 3.323774000  | 1.906942000  | -1.238087000 |
| 6  | -3.506732000 | 1.421637000  | 0.270256000  |
| 1  | -3.323693000 | 1.906987000  | 1.238037000  |
| 6  | 3.348181000  | 2.485269000  | 0.820985000  |
| 1  | 2.332373000  | 2.888239000  | 0.819931000  |
| 1  | 3.543467000  | 2.063969000  | 1.814343000  |
| 1  | 4.063877000  | 3.299597000  | 0.664308000  |
| 6  | 4.906696000  | 0.803616000  | -0.276536000 |
| 1  | 5.030356000  | 0.066039000  | -1.075808000 |
| 1  | 5.666121000  | 1.579887000  | -0.420732000 |
| 1  | 5.123255000  | 0.308870000  | 0.676816000  |
| 6  | -4.906670000 | 0.803690000  | 0.276535000  |
| 1  | -5.123254000 | 0.308923000  | -0.676800000 |
| 1  | -5.030344000 | 0.066140000  | 1.075830000  |
| 1  | -5.666070000 | 1.579989000  | 0.420717000  |
| 6  | -3.348111000 | 2.485265000  | -0.821047000 |
| 1  | -4.063788000 | 3.299612000  | -0.664385000 |
| 1  | -2.332293000 | 2.888206000  | -0.820005000 |
| 1  | -3.543411000 | 2.063945000  | -1.814394000 |
| 26 | -0.000021000 | 0.470707000  | -0.000008000 |
| 1  | 0.066646000  | 1.582008000  | 1.104390000  |
| 1  | 0.152804000  | -0.163301000 | 2.263744000  |
| 6  | -2.571261000 | -0.880094000 | -1.303103000 |
| 1  | -2.824524000 | -0.204546000 | -2.128675000 |
| 1  | -3.440256000 | -1.523207000 | -1.127407000 |
| 6  | -1.351850000 | -1.726668000 | -1.685911000 |
| 1  | -1.247094000 | -2.563854000 | -0.986239000 |
| 1  | -1.486465000 | -2.166683000 | -2.686013000 |
| 6  | 2.366669000  | -0.895482000 | -1.633831000 |
| 1  | 3.245914000  | -1.545713000 | -1.571275000 |
| 1  | 2.514841000  | -0.224059000 | -2.488315000 |
| 6  | 1.101919000  | -1.735028000 | -1.848786000 |
| 1  | 1.085934000  | -2.570558000 | -1.139473000 |
| 1  | 1.099651000  | -2.177336000 | -2.856954000 |
| 7  | -0.111563000 | -0.941409000 | -1.606814000 |
| 1  | -0.066852000 | 1.581869000  | -1.104543000 |
| 1  | -0.152807000 | -0.163370000 | -2.263712000 |

### I3

|    |              |             |              |
|----|--------------|-------------|--------------|
| 15 | -2.209883000 | 0.033524000 | -0.070042000 |
|----|--------------|-------------|--------------|

|    |              |              |              |
|----|--------------|--------------|--------------|
| 7  | -0.403396000 | -2.188730000 | -0.512189000 |
| 6  | -1.687173000 | -2.686015000 | 0.004111000  |
| 6  | 0.741871000  | -3.034832000 | -0.147223000 |
| 6  | 2.062033000  | -2.408856000 | -0.610478000 |
| 6  | -2.827935000 | -1.710552000 | -0.308779000 |
| 1  | -3.713531000 | -1.957600000 | 0.286350000  |
| 1  | 2.179414000  | -2.550621000 | -1.691607000 |
| 15 | 1.992805000  | -0.564809000 | -0.335397000 |
| 1  | -3.107776000 | -1.797809000 | -1.365242000 |
| 1  | 2.907721000  | -2.903484000 | -0.120720000 |
| 1  | -1.917591000 | -3.687363000 | -0.390739000 |
| 1  | -1.577550000 | -2.794260000 | 1.089249000  |
| 1  | 0.737749000  | -3.130171000 | 0.944572000  |
| 1  | 0.635038000  | -4.052645000 | -0.552700000 |
| 6  | -3.511132000 | 1.102694000  | -0.835436000 |
| 1  | -3.229109000 | 2.110488000  | -0.502699000 |
| 6  | 3.443384000  | 0.065342000  | -1.297865000 |
| 1  | 3.236184000  | -0.281139000 | -2.318896000 |
| 6  | -3.371393000 | 1.060652000  | -2.360593000 |
| 1  | -2.336985000 | 1.251092000  | -2.657190000 |
| 1  | -3.661206000 | 0.080157000  | -2.756796000 |
| 1  | -4.026429000 | 1.807182000  | -2.822512000 |
| 6  | -4.940246000 | 0.805862000  | -0.375990000 |
| 1  | -5.046577000 | 0.866543000  | 0.711714000  |
| 1  | -5.640084000 | 1.522906000  | -0.818744000 |
| 1  | -5.255430000 | -0.194883000 | -0.691727000 |
| 6  | 4.799287000  | -0.483904000 | -0.848702000 |
| 1  | 5.044104000  | -0.147181000 | 0.164654000  |
| 1  | 4.826084000  | -1.578095000 | -0.857135000 |
| 1  | 5.594454000  | -0.127109000 | -1.512305000 |
| 6  | 3.417656000  | 1.596656000  | -1.313396000 |
| 1  | 4.197047000  | 1.984950000  | -1.977749000 |
| 1  | 2.445102000  | 1.961993000  | -1.651708000 |
| 1  | 3.609933000  | 2.003897000  | -0.312954000 |
| 26 | -0.096331000 | -0.073682000 | -0.394371000 |
| 1  | -0.188742000 | -0.081096000 | -1.959620000 |
| 1  | -0.453267000 | -2.094850000 | -1.526005000 |
| 6  | 2.485461000  | -0.350353000 | 1.449984000  |
| 1  | 2.825836000  | 0.685784000  | 1.558128000  |
| 1  | 3.303917000  | -1.004102000 | 1.769795000  |
| 6  | 1.250014000  | -0.571577000 | 2.329143000  |
| 1  | 1.039314000  | -1.643655000 | 2.415223000  |
| 1  | 1.433753000  | -0.201117000 | 3.348945000  |
| 6  | -2.400884000 | 0.342832000  | 1.758920000  |
| 1  | -3.320590000 | -0.064937000 | 2.192151000  |
| 1  | -2.433774000 | 1.432232000  | 1.882516000  |
| 6  | -1.174757000 | -0.221910000 | 2.484582000  |
| 1  | -1.261422000 | -1.311290000 | 2.566702000  |
| 1  | -1.120812000 | 0.169293000  | 3.511927000  |
| 7  | 0.060515000  | 0.061596000  | 1.737907000  |
| 1  | 0.084271000  | 1.477108000  | -0.454687000 |



|   |             |             |              |
|---|-------------|-------------|--------------|
| 1 | 0.213014000 | 1.068406000 | 1.713715000  |
| 6 | 0.998185000 | 3.449272000 | 0.472684000  |
| 8 | 0.895635000 | 4.048071000 | -0.518790000 |
| 8 | 1.158447000 | 2.979985000 | 1.535732000  |

## TS2

|    |              |              |              |
|----|--------------|--------------|--------------|
| 15 | -2.024309000 | -0.314304000 | -0.094206000 |
| 7  | 0.162081000  | -2.135166000 | -0.645681000 |
| 6  | -1.029681000 | -2.892435000 | -0.234075000 |
| 6  | 1.426132000  | -2.792323000 | -0.280780000 |
| 6  | 2.632108000  | -1.922854000 | -0.656157000 |
| 6  | -2.311406000 | -2.104386000 | -0.522841000 |
| 1  | -3.161334000 | -2.554898000 | 0.000364000  |
| 1  | 2.807864000  | -1.981255000 | -1.737155000 |
| 15 | 2.230154000  | -0.139093000 | -0.291359000 |
| 1  | -2.531021000 | -2.134502000 | -1.596448000 |
| 1  | 3.535016000  | -2.290697000 | -0.157315000 |
| 1  | -1.064834000 | -3.879034000 | -0.720415000 |
| 1  | -0.940941000 | -3.076030000 | 0.842632000  |
| 1  | 1.404142000  | -2.952668000 | 0.803063000  |
| 1  | 1.509358000  | -3.786626000 | -0.745390000 |
| 6  | -3.488998000 | 0.578185000  | -0.787837000 |
| 1  | -3.416627000 | 1.574863000  | -0.333271000 |
| 6  | 3.533530000  | 0.806088000  | -1.200689000 |
| 1  | 3.387009000  | 0.492630000  | -2.242709000 |
| 6  | -3.308235000 | 0.749716000  | -2.299365000 |
| 1  | -2.331567000 | 1.185760000  | -2.522006000 |
| 1  | -3.375537000 | -0.213912000 | -2.818140000 |
| 1  | -4.094140000 | 1.396918000  | -2.702851000 |
| 6  | -4.843405000 | -0.035973000 | -0.427905000 |
| 1  | -4.977277000 | -0.137619000 | 0.653796000  |
| 1  | -5.657983000 | 0.590777000  | -0.806403000 |
| 1  | -4.958426000 | -1.027956000 | -0.878515000 |
| 6  | 4.968823000  | 0.485127000  | -0.777843000 |
| 1  | 5.151740000  | 0.790875000  | 0.258157000  |
| 1  | 5.195590000  | -0.582586000 | -0.860668000 |
| 1  | 5.682249000  | 1.026380000  | -1.408585000 |
| 6  | 3.225540000  | 2.304902000  | -1.117706000 |
| 1  | 3.903249000  | 2.867665000  | -1.768504000 |
| 1  | 2.192408000  | 2.502613000  | -1.414056000 |
| 1  | 3.362931000  | 2.681199000  | -0.097088000 |
| 26 | 0.091320000  | -0.018296000 | -0.366779000 |
| 1  | 0.018429000  | 0.078496000  | -1.927429000 |
| 1  | 0.134757000  | -1.978624000 | -1.652598000 |
| 6  | 2.651615000  | 0.074453000  | 1.510729000  |
| 1  | 2.781604000  | 1.150779000  | 1.673584000  |
| 1  | 3.579406000  | -0.420529000 | 1.816828000  |
| 6  | 1.473189000  | -0.432703000 | 2.348326000  |
| 1  | 1.476498000  | -1.528442000 | 2.366994000  |
| 1  | 1.570483000  | -0.098703000 | 3.392169000  |
| 6  | -2.282173000 | -0.233709000 | 1.750508000  |

|   |              |              |              |
|---|--------------|--------------|--------------|
| 1 | -3.101643000 | -0.861800000 | 2.116057000  |
| 1 | -2.535675000 | 0.807513000  | 1.980985000  |
| 6 | -0.971285000 | -0.605312000 | 2.453225000  |
| 1 | -0.832944000 | -1.692256000 | 2.436194000  |
| 1 | -1.007523000 | -0.306213000 | 3.511481000  |
| 7 | 0.187983000  | -0.007860000 | 1.769473000  |
| 1 | 0.097733000  | 1.550716000  | -0.330262000 |
| 1 | 0.113390000  | 1.007096000  | 1.841348000  |
| 6 | -0.935985000 | 3.097104000  | 0.489792000  |
| 8 | -1.357215000 | 3.554992000  | -0.500373000 |
| 8 | -0.676214000 | 2.897834000  | 1.624755000  |

#### I4

|    |              |              |              |
|----|--------------|--------------|--------------|
| 15 | -2.096788000 | -0.210197000 | -0.062377000 |
| 7  | 0.068001000  | -1.981305000 | -0.860784000 |
| 6  | -1.138726000 | -2.755051000 | -0.506979000 |
| 6  | 1.308540000  | -2.722381000 | -0.565906000 |
| 6  | 2.547143000  | -1.873273000 | -0.864882000 |
| 6  | -2.409348000 | -1.923382000 | -0.694027000 |
| 1  | -3.260701000 | -2.416746000 | -0.214863000 |
| 1  | 2.711091000  | -1.820097000 | -1.947605000 |
| 15 | 2.234938000  | -0.135591000 | -0.295981000 |
| 1  | -2.641150000 | -1.825396000 | -1.760754000 |
| 1  | 3.437420000  | -2.327999000 | -0.418981000 |
| 1  | -1.190456000 | -3.683626000 | -1.092989000 |
| 1  | -1.036587000 | -3.047771000 | 0.542653000  |
| 1  | 1.280419000  | -2.983139000 | 0.496752000  |
| 1  | 1.343531000  | -3.667758000 | -1.125846000 |
| 6  | -3.499374000 | 0.829892000  | -0.647102000 |
| 1  | -3.371416000 | 1.756853000  | -0.075228000 |
| 6  | 3.536641000  | 0.878655000  | -1.122683000 |
| 1  | 3.402052000  | 0.648780000  | -2.187756000 |
| 6  | -3.288866000 | 1.183905000  | -2.122154000 |
| 1  | -2.327046000 | 1.684791000  | -2.249604000 |
| 1  | -3.314908000 | 0.293785000  | -2.762624000 |
| 1  | -4.084997000 | 1.856494000  | -2.457454000 |
| 6  | -4.876969000 | 0.225848000  | -0.368298000 |
| 1  | -5.019857000 | -0.009374000 | 0.691318000  |
| 1  | -5.661281000 | 0.932115000  | -0.659110000 |
| 1  | -5.033945000 | -0.692499000 | -0.945649000 |
| 6  | 4.966194000  | 0.521439000  | -0.708555000 |
| 1  | 5.141490000  | 0.759279000  | 0.345980000  |
| 1  | 5.188107000  | -0.539977000 | -0.859151000 |
| 1  | 5.686115000  | 1.098611000  | -1.297828000 |
| 6  | 3.225886000  | 2.366468000  | -0.921046000 |
| 1  | 3.945737000  | 2.978588000  | -1.473740000 |
| 1  | 2.219576000  | 2.609348000  | -1.271474000 |
| 1  | 3.293722000  | 2.651431000  | 0.134684000  |
| 26 | 0.063979000  | 0.043283000  | -0.336491000 |
| 1  | -0.021654000 | 0.351442000  | -1.855618000 |
| 1  | 0.038583000  | -1.766099000 | -1.856467000 |

|   |              |              |              |
|---|--------------|--------------|--------------|
| 6 | 2.648410000  | -0.119352000 | 1.512803000  |
| 1 | 2.777957000  | 0.934658000  | 1.784990000  |
| 1 | 3.575913000  | -0.645483000 | 1.760628000  |
| 6 | 1.463809000  | -0.699665000 | 2.293918000  |
| 1 | 1.461906000  | -1.793593000 | 2.213977000  |
| 1 | 1.567151000  | -0.462969000 | 3.362619000  |
| 6 | -2.283234000 | -0.302880000 | 1.781184000  |
| 1 | -3.137202000 | -0.901895000 | 2.113618000  |
| 1 | -2.441177000 | 0.732041000  | 2.104733000  |
| 6 | -0.979929000 | -0.820325000 | 2.402138000  |
| 1 | -0.898463000 | -1.906767000 | 2.275149000  |
| 1 | -0.983300000 | -0.627722000 | 3.484721000  |
| 7 | 0.189680000  | -0.195014000 | 1.763229000  |
| 1 | 0.212324000  | 1.772167000  | -0.159561000 |
| 1 | 0.125103000  | 0.834315000  | 1.945639000  |
| 6 | -0.522436000 | 2.491613000  | 0.466735000  |
| 8 | -1.248294000 | 3.163746000  | -0.251410000 |
| 8 | -0.340454000 | 2.440110000  | 1.702784000  |
